# Supplementary material for: Comparative analysis of pre- and post-parasitic transcriptomes and mining pioneer effectors of Heterodera avenae
Source: PubMed Central journal article supplement (PMC5309974; doi:10.1186/s13578-017-0138-6), 2017-02-14

**Additional file 1: Figure S1.** The distribution of categories of GO (A) and KEGG pathways (B) annotations for *H. avenae* ESTs (GO terms: Level < 3, Percent of genes > 5%).

A

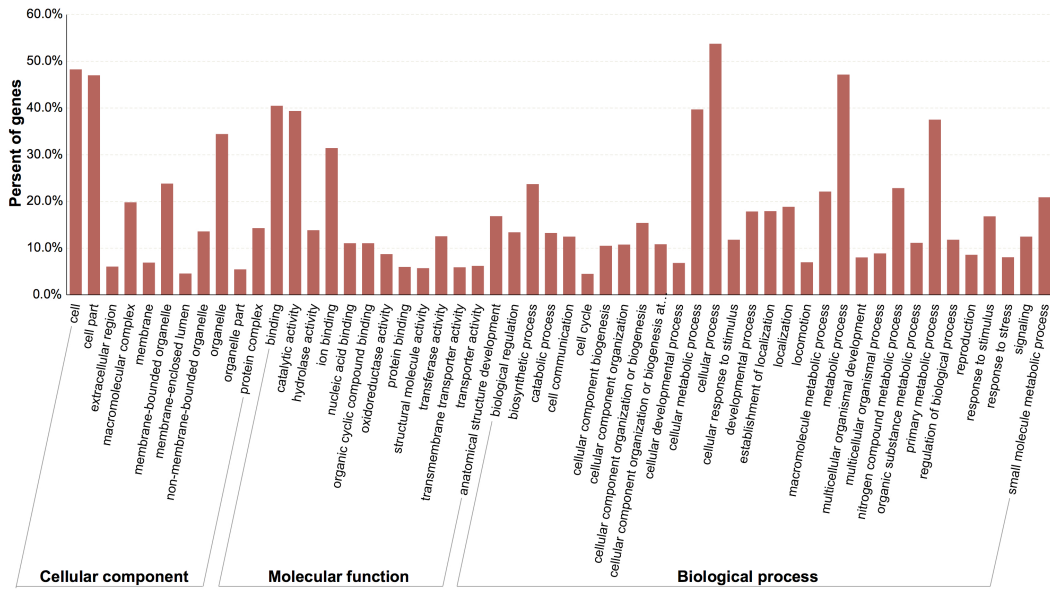

B

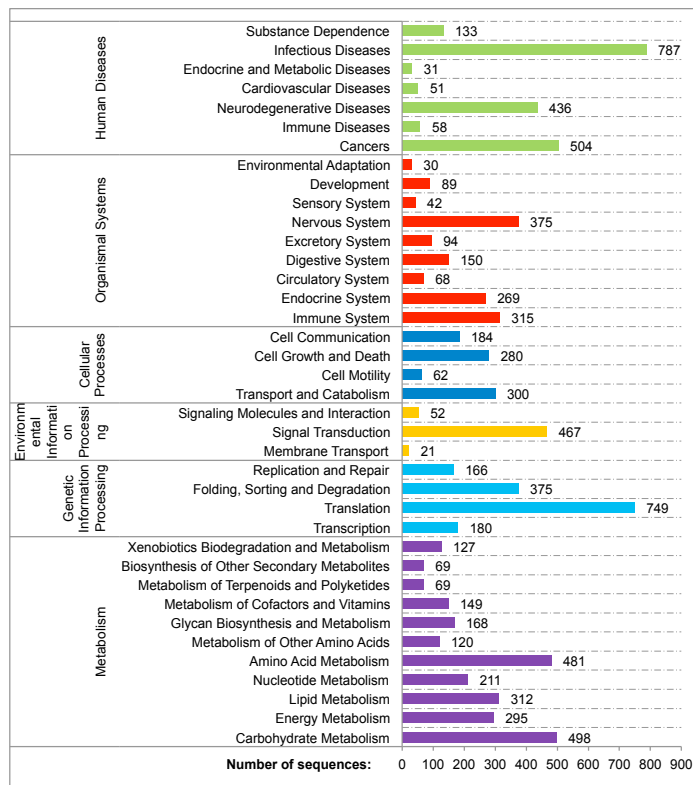

Supplement: 13578_2017_138_MOESM1_ESM.pdf [file 13578_2017_138_MOESM1_ESM.pdf]
