# Supplementary material for: Comparative analysis of pre- and post-parasitic transcriptomes and mining pioneer effectors of Heterodera avenae
Source: PubMed Central journal article supplement (PMC5309974; doi:10.1186/s13578-017-0138-6), 2017-02-14

**Additional file 2: Figure S2.** Hierarchical layout of significantly enriched GOs of orthologous identified in *H. avenae* and 7 other nematodes. (A) Enriched GOs of orthologous present in *H. avenae* and all other 7 nematodes (*Globodera pallida*, *Meloidogyne incognita*, *Meloidogyne hapla*, *Bursaphelenchus xylophilus*, *Caenorhabditis elegans*, *Pristionchus pacificus* and *Ascaris suum*). (B) Enriched GOs of orthologous shared only by *H. avenae* and other plant-parasitic nematodes (*G. pallida*, *M. incognita*, *M. hapla* and *B. xylophilus*). (C) Enriched GOs of orthologous shared only by *H. avenae* and other sedentary plant-nematodes (*G. pallida*, *M. incognita* and *M. hapla*). (D) Enriched GOs of orthologous present only in cyst nematodes *H. avenae* and *G. pallida*. Light color represents significant enrichment ( $p < 0.1$ ) and darker color represents more significant enrichment ( $p < 0.05$ ).

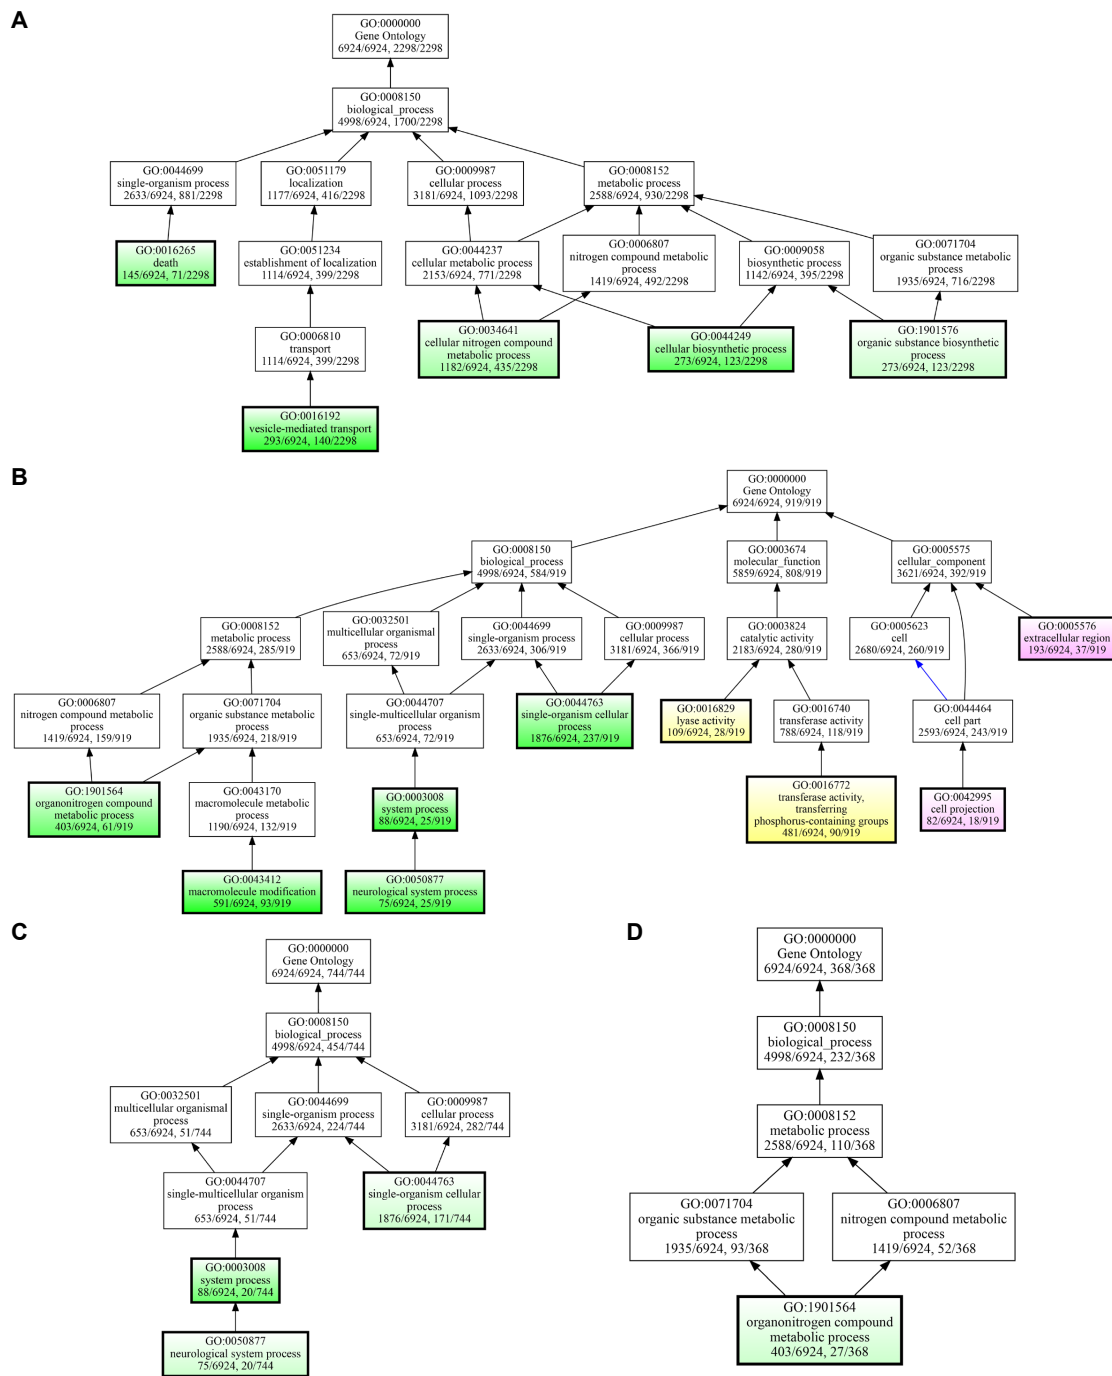

Supplement: 13578_2017_138_MOESM2_ESM.pdf [file 13578_2017_138_MOESM2_ESM.pdf]
