# Supplementary material for: Comparative analysis of pre- and post-parasitic transcriptomes and mining pioneer effectors of Heterodera avenae
Source: PubMed Central journal article supplement (PMC5309974; doi:10.1186/s13578-017-0138-6), 2017-02-14
Supplement: 13578_2017_138_MOESM3_ESM.pdf [file 13578_2017_138_MOESM3_ESM.pdf]

**Additional file 3: Table S1.** Comparative analyses of orthologous identified in biological pathways. Orthologous in RNAi pathway (A), immune responses (B), dauer/diapause pathway (C) and the synthesis, transportation and metabolism of neurotransmitters (D) were compared among *C. elegans*, *H. avenae* and other 6 nematodes with published genomic data. Cel, *Caenorhabditis elegans*; CCN, Cereal cyst nematode *H. avenae*; Gpa, *Globodera pallida*; Mha, *Meloidogyne hapla*; Min, *Meloidogyne incognita*; Bxy, *Bursaphelenchus xylophilus*; Asu, *Ascaris suum*; Ppa, *Pristionchus pacificus*.

**Table S1A.** Comparison of orthologous identified in RNAi pathway among *C. elegans*, *H. avenae* and other 6 nematodes with published genomic data.

| Gene function                   | Cel            | CCN          | Gpa | Mha | Min | Bxy | Asu | Ppa |
|---------------------------------|----------------|--------------|-----|-----|-----|-----|-----|-----|
| Small RNA biosynthetic proteins | <i>drh-3</i>   | +            | +   | +   | +   | +   | +   | +   |
|                                 | <i>drsh-1</i>  | +            | +   | +   | +   | +   | +   | +   |
|                                 | <i>xpo-1</i>   | +            | +   | +   | +   | +   | +   | +   |
|                                 | <i>xpo-2</i>   | +            | +   | +   | +   | +   | +   | +   |
|                                 | <i>dcr-1</i>   | +            | +   | +   | +   | +   | +   | +   |
|                                 | <i>drh-1</i>   |              |     |     | +   | +   | +   | +   |
|                                 | <i>pash-1</i>  | +            | +   | +   | +   | +   | +   | +   |
|                                 | <i>rde-4</i>   |              |     |     |     |     |     |     |
|                                 | <i>xpo-3</i>   | +            |     |     |     |     | +   |     |
|                                 | Amplification  | <i>smg-2</i> | +   | +   | +   | +   | +   | +   |
| <i>smg-6</i>                    |                | +            | +   | +   | +   | +   | +   | +   |
| <i>ego-1</i>                    |                | +            | +   | +   | +   | +   | +   | +   |
| <i>rrf-3</i>                    |                |              |     |     |     | +   | +   | +   |
| <i>rrf-1</i>                    |                |              |     |     |     |     |     |     |
| <i>smg-5</i>                    |                |              |     |     |     |     |     |     |
| Spreading                       | <i>rsd-2</i>   |              |     |     |     |     |     |     |
|                                 | <i>rsd-3</i>   | +            | +   | +   | +   | +   | +   | +   |
|                                 | <i>sid-1</i>   |              |     |     |     |     | +   |     |
|                                 | <i>rsd-6</i>   |              |     |     |     |     |     |     |
| Argonautes                      | <i>sid-2</i>   |              |     |     |     |     |     |     |
|                                 | <i>alg-1</i>   | +            | +   | +   | +   | +   | +   | +   |
|                                 | <i>wago-1</i>  | +            | +   | +   | +   | +   | +   | +   |
|                                 | C04F12.1       | +            | +   | +   | +   | +   | +   | +   |
|                                 | <i>wago-4</i>  | +            | +   | +   | +   | +   | +   | +   |
|                                 | <i>alg-4</i>   |              |     |     |     | +   | +   | +   |
|                                 | <i>rde-1</i>   | +            | +   | +   | +   | +   | +   | +   |
|                                 | <i>hrde-1</i>  | +            | +   | +   | +   | +   | +   | +   |
|                                 | <i>ppw-1</i>   |              |     |     |     |     |     |     |
|                                 | <i>csr-1</i>   | +            | +   | +   | +   | +   |     |     |
|                                 | <i>ppw-2</i>   | +            | +   | +   | +   | +   | +   | +   |
|                                 | <i>sago-1</i>  |              |     |     |     |     |     |     |
|                                 | <i>alg-3</i>   |              |     |     |     | +   | +   | +   |
|                                 | <i>wago-10</i> | +            | +   | +   | +   | +   | +   | +   |
|                                 | <i>alg-2</i>   |              |     |     |     |     |     |     |
|                                 | <i>ergo-1</i>  |              |     |     |     |     |     |     |
|                                 | <i>prg-1</i>   |              |     |     |     |     |     | +   |
|                                 | <i>wago-2</i>  | +            | +   | +   | +   | +   | +   | +   |
|                                 | <i>hpo-24</i>  |              |     |     |     |     |     |     |
|                                 | <i>nrde-3</i>  | +            | +   | +   | +   | +   | +   | +   |
| <i>sago-2</i>                   |                |              |     |     |     |     |     |     |
| T23B3.2                         |                |              |     |     |     |     | +   |     |
| <i>wago-11</i>                  | +              | +            | +   | +   | +   | +   | +   |     |
| <i>wago-5</i>                   | +              | +            | +   | +   | +   | +   | +   |     |
| <i>prg-2</i>                    |                |              |     |     |     |     | +   |     |
| Other RISC components           | <i>tsn-1</i>   | +            | +   | +   | +   | +   | +   | +   |
|                                 | <i>ain-1</i>   | +            |     | +   | +   | +   | +   |     |
|                                 | <i>vig-1</i>   |              |     |     |     | +   | +   | +   |
|                                 | <i>ain-2</i>   | +            | +   |     |     |     |     |     |

|                               |                |   |   |   |   |   |   |   |
|-------------------------------|----------------|---|---|---|---|---|---|---|
|                               | <i>eri-1</i>   | + | + | + | + |   | + | + |
|                               | <i>xrn-2</i>   | + | + | + | + | + | + | + |
|                               | <i>adr-2</i>   |   |   |   |   |   | + | + |
|                               | <i>xrn-1</i>   |   |   |   |   |   | + | + |
|                               | <i>adr-1</i>   |   |   |   |   | + | + |   |
| <b>RNAi inhibitors</b>        | <i>lin-15b</i> |   |   |   |   |   |   |   |
|                               | <i>eri-5</i>   |   |   |   |   |   |   |   |
|                               | <i>eri-6</i>   |   |   |   |   |   |   |   |
|                               | <i>eri-7</i>   | + |   |   |   | + | + |   |
|                               | <i>eri-3</i>   |   |   |   |   |   |   |   |
|                               | <i>mut-7</i>   | + | + | + |   | + | + | + |
|                               | <i>cid-1</i>   | + | + | + | + | + | + |   |
| <b>Nuclear RNAi effectors</b> | <i>ekl-1</i>   | + | + | + | + | + | + | + |
|                               | <i>gfl-1</i>   | + | + |   | + | + | + |   |
|                               | <i>mes-2</i>   | + | + | + | + | + | + |   |
|                               | <i>ekl-4</i>   | + |   | + | + | + | + | + |
|                               | <i>mes-6</i>   | + | + | + |   | + | + |   |
|                               | <i>rha-1</i>   | + | + | + | + | + | + |   |
|                               | <i>ekl-6</i>   |   |   |   |   | + | + | + |
|                               | <i>zfp-1</i>   |   |   |   |   |   | + | + |
|                               | <i>mut-2</i>   |   |   |   |   |   |   | + |
|                               | <i>ekl-5</i>   |   |   |   |   |   |   |   |
|                               | <i>mes-3</i>   |   |   |   |   |   |   |   |
|                               | <i>mut-16</i>  |   |   |   |   |   |   |   |
|                               | <i>rde-2</i>   |   |   |   |   |   |   |   |

Cel, *Caenorhabditis elegans*; CCN, Cereal cyst nematode *H. avenae*; Gpa, *Globodera pallida*; Mha, *Meloidogyne hapla*; Min, *Meloidogyne incognita*; Bxy, *Bursaphelenchus xylophilus*; Asu, *Ascaris suum*; Ppa, *Pristionchus pacificus*.

**Table S1B.** Comparison of orthologous identified in immune responses among *C. elegans*, *H. avenae* and other 6 nematodes with published genomic data.

| Immune signaling                         | Cel           | CCN | Gpa | Mha | Min | Bxy | Asu | Ppa |
|------------------------------------------|---------------|-----|-----|-----|-----|-----|-----|-----|
| DBL-1/TGF-beta signalling pathway        | <i>dbl-1</i>  | +   | +   | +   | +   | +   | +   | +   |
|                                          | <i>sma-2</i>  | +   | +   | +   | +   | +   | +   | +   |
|                                          | <i>sma-3</i>  | +   | +   | +   | +   | +   | +   |     |
|                                          | <i>sma-4</i>  | +   | +   | +   | +   | +   | +   | +   |
| ERK MAPK signalling pathway              | <i>lin-45</i> | +   | +   | +   | +   | +   | +   | +   |
|                                          | <i>mak-2</i>  | +   | +   | +   | +   | +   | +   | +   |
|                                          | <i>mpk-1</i>  | +   | +   | +   | +   | +   | +   |     |
| P38 MAPK signalling pathway              | <i>nsy-1</i>  | +   | +   | +   | +   | +   | +   | +   |
|                                          | <i>pmk-1</i>  | +   | +   | +   |     | +   | +   | +   |
|                                          | <i>sek-1</i>  | +   | +   | +   | +   | +   | +   |     |
|                                          | <i>tir-1</i>  | +   | +   | +   | +   | +   | +   | +   |
| Toll signalling pathway                  | <i>tol-1</i>  | +   | +   | +   | +   | +   | +   |     |
|                                          | <i>trf-1</i>  | +   |     |     |     | +   | +   | +   |
|                                          | <i>ikb-1</i>  |     |     |     |     |     | +   | +   |
|                                          | <i>plk-1</i>  | +   | +   | +   | +   | +   | +   |     |
| Insulin (DAF-2/DAF-16) signaling pathway | <i>age-1</i>  | +   |     | +   | +   | +   | +   | +   |
|                                          | <i>pdk-1</i>  | +   | +   | +   | +   | +   | +   | +   |
|                                          | <i>akt-1</i>  | +   | +   | +   | +   | +   | +   | +   |
|                                          | <i>akt-2</i>  | +   | +   | +   | +   | +   | +   | +   |
|                                          | <i>daf-16</i> | +   | +   | +   |     | +   | +   |     |
|                                          | <i>daf-2</i>  | +   | +   | +   | +   | +   | +   | +   |

Cel, *Caenorhabditis elegans*; CCN, Cereal cyst nematode *H. avenae*; Gpa, *Globodera pallida*; Mha, *Meloidogyne hapla*; Min, *Meloidogyne incognita*; Bxy, *Bursaphelenchus xylophilus*; Asu, *Ascaris suum*; Ppa, *Pristionchus pacificus*.

**Table S1C.** Comparison of orthologous identified in dauer/diapause pathway among *C. elegans*, *H. avenae* and *G. pallida*.

| Dauer pathway                       | Protein                           | Cel              | CCN          | Gpa |
|-------------------------------------|-----------------------------------|------------------|--------------|-----|
| Guanylyl cyclase pathway            | Transmembrane guanylate cyclase   | <i>daf-11</i>    | +            | +   |
|                                     | cGMP-gated channel                | <i>tax-2</i>     | +            | +   |
|                                     | cGMP-gated channel                | <i>tax-4</i>     | +            | +   |
| TGF $\beta$ -like                   | TGF- $\beta$ type I receptor      | <i>daf-1</i>     | +            | +   |
|                                     | SMAD transcription factor         | <i>daf-3</i>     | +            | +   |
|                                     | TGF $\beta$ type II receptor      | <i>daf-4</i>     | +            | +   |
|                                     | Proline rich protein              | <i>daf-5</i>     |              |     |
|                                     | BMP/TGF- $\beta$                  | <i>daf-7</i>     | +            | +   |
|                                     | SMAD transcription factor         | <i>daf-8</i>     |              |     |
|                                     | SMAD transcription factor         | <i>daf-14</i>    |              |     |
|                                     | Glutamine rich protein            | <i>scd-1</i>     | +            | +   |
|                                     | Tyrosine kinase                   | <i>scd-2</i>     | +            | +   |
|                                     | Zn-finger protein                 | <i>bra-1</i>     | +            |     |
|                                     | Tyrosine kinase                   | <i>cam-1</i>     | +            | +   |
|                                     | cGMP-dependent protein kinase     | <i>egl-4</i>     | +            | +   |
|                                     | Insulin/IGF                       | Insulin receptor | <i>daf-2</i> | +   |
| Ortholog RAPTOR protein             |                                   | <i>daf-15</i>    | +            | +   |
| FOXO transcription factor           |                                   | <i>daf-16</i>    | +            | +   |
| Phosphoinositide 3-phosphatase PTEN |                                   | <i>daf-18</i>    | +            |     |
| $\beta$ -insulin                    |                                   | <i>daf-28</i>    |              |     |
| Phosphoinositide 3-kinase           |                                   | <i>age-1</i>     | +            |     |
| 3-phosphoinositide-dependent kinase |                                   | <i>pdk-1</i>     | +            | +   |
| Serine/threonine kinase             |                                   | <i>akt-1</i>     | +            | +   |
| Serine/threonine kinase             |                                   | <i>akt-2</i>     | +            | +   |
| Serine/threonine kinase             | <i>sgk-1</i>                      | +                |              |     |
| Steroid hormone pathway             | Cytochrome P450                   | <i>daf-9</i>     | +            | +   |
|                                     | Nuclear receptor                  | <i>daf-12</i>    | +            | +   |
|                                     | Rieske oxygenase, hormone pathway | <i>daf-36</i>    | +            |     |
| Other processes                     | amphid morphology                 | <i>daf-6</i>     |              | +   |
|                                     | WD-WAA rep                        | <i>daf-10</i>    | +            | +   |
|                                     | RFX transcription factor          | <i>daf-19</i>    | +            | +   |
|                                     | HSP-90                            | <i>daf-21</i>    |              | +   |

Cel, *Caenorhabditis elegans*; CCN, Cereal cyst nematode *H. avenae*; Gpa, *Globodera pallida*.

**Table S1D.** Comparison of orthologous identified in the synthesis, transportation and metabolism of neurotransmitters among *C. elegans*, *H. avenae* and other 4 plant-parasitic nematodes.

| Neurotransmitter | Gene function                         | Cel           | CCN | Gpa | Mha | Min | Bxy |
|------------------|---------------------------------------|---------------|-----|-----|-----|-----|-----|
| Acetylcholine    | Choline acetyltransferase             | <i>cha-1</i>  | +   | +   | +   | +   | +   |
|                  | Synaptic acetylcholine transporter    | <i>unc-17</i> | +   | +   | +   |     | +   |
|                  | Choline transporter                   | <i>cho-1</i>  | +   | +   | +   |     | +   |
|                  | Post-synaptic transporter             | <i>snf-6</i>  | +   | +   | +   | +   | +   |
|                  | Acetylcholinesterase                  | <i>ace-1</i>  | +   | +   | +   |     | +   |
|                  | Acetylcholinesterase                  | <i>ace-2</i>  | +   | +   |     | +   | +   |
|                  | Acetylcholinesterase                  | <i>ace-3</i>  | +   | +   | +   | +   | +   |
|                  | Acetylcholinesterase                  | <i>ace-4</i>  |     |     |     |     |     |
| Serotonin        | Tryptophan hydroxylase                | <i>tph-1</i>  |     | +   | +   |     | +   |
|                  | GTP-cyclohydrolase I                  | <i>cat-4</i>  | +   | +   | +   |     | +   |
|                  | Aromatic AA decarboxylase             | <i>bas-1</i>  | +   | +   | +   |     | +   |
|                  | Vesicular monoamine transporter       | <i>cat-1</i>  | +   | +   | +   |     | +   |
|                  | Serotonin reuptake transporter        | <i>mod-5</i>  | +   | +   | +   | +   | +   |
|                  | Monoamine oxidase                     | <i>amx-1</i>  |     |     |     |     | +   |
|                  | Monoamine oxidase                     | <i>amx-2</i>  |     |     |     |     |     |
|                  | Monoamine oxidase                     | <i>amx-3</i>  |     |     |     |     |     |
| Dopamine         | Tyrosine hydroxylase                  | <i>cat-2</i>  |     |     |     |     | +   |
|                  | Dopamine reuptake transporter         | <i>dat-1</i>  | +   | +   | +   |     | +   |
| Tyramine         | Tyrosine decarboxylase                | <i>tdc-1</i>  | +   | +   | +   | +   | +   |
| Octopamine       | Tyramine $\beta$ -hydroxylase         | <i>tbh-1</i>  | +   | +   | +   | +   | +   |
| Glutamate        | Vesicular glutamate transporter       | <i>eat-4</i>  | +   | +   | +   | +   | +   |
|                  | Plasma membrane glutamate transporter | <i>glt-1</i>  | +   | +   | +   | +   | +   |
| GABA             | Glutamate decarboxylase               | <i>unc-25</i> | +   | +   | +   | +   | +   |
|                  | Vesicular GABA transporter            | <i>unc-47</i> | +   | +   | +   | +   | +   |
|                  | GABA transporter                      | <i>snf-11</i> | +   | +   | +   | +   | +   |
|                  | GABA transaminase                     | <i>gta-1</i>  | +   | +   | +   | +   | +   |

Cel, *Caenorhabditis elegans*; CCN, Cereal cyst nematode *H. avenae*; Gpa, *Globodera pallida*; Mha, *Meloidogyne hapla*; Min, *Meloidogyne incognita*; Bxy, *Bursaphelenchus xylophilus*.
