# Supplementary material for: Comparative analysis of pre- and post-parasitic transcriptomes and mining pioneer effectors of Heterodera avenae
Source: PubMed Central journal article supplement (PMC5309974; doi:10.1186/s13578-017-0138-6), 2017-02-14
Supplement: 13578_2017_138_MOESM4_ESM.pdf [file 13578_2017_138_MOESM4_ESM.pdf]

**Additional file 4: Table S2.** Datasets of the nematoda ESTs used in this study. The datasets from NCBI and Nembase 4 databases consist of 1,331,401 ESTs sequences from 45 genres and 75 species clustered into three life styles. \* Life style classification: FLN, free living nematode; PPN, plant parasitic nematode; APN, animal parasitic nematode.

| Life style classification* | Genus                   | Species                              | Texid  | Num. of ESTs |
|----------------------------|-------------------------|--------------------------------------|--------|--------------|
| FLN                        | <i>Caenorhabditis</i>   | <i>Caenorhabditis briggsae</i>       | 6238   | 2424         |
| FLN                        | <i>Caenorhabditis</i>   | <i>Caenorhabditis elegans</i>        | 6239   | 396687       |
| FLN                        | <i>Caenorhabditis</i>   | <i>Caenorhabditis remanei</i>        | 31234  | 20292        |
| FLN                        | <i>Zeldia</i>           | <i>Zeldia punctata</i>               | 49351  | 391          |
| FLN                        | <i>Pristionchus</i>     | <i>Pristionchus pacificus</i>        | 54126  | 37470        |
| FLN                        | <i>Caenorhabditis</i>   | <i>Caenorhabditis brenneri</i>       | 135651 | 30074        |
| FLN                        | <i>Panagrolaimus</i>    | <i>Panagrolaimus davidi</i>          | 227884 | 95141        |
| FLN                        | <i>Caenorhabditis</i>   | <i>Caenorhabditis japonica</i>       | 281687 | 33050        |
| FLN                        | <i>Panagrolaimus</i>    | <i>Panagrolaimus superbus</i>        | 310955 | 7609         |
| FLN                        | <i>Caenorhabditis</i>   | <i>Caenorhabditis</i> sp. 5 AC-2008  | 497871 | 3868         |
| FLN                        | <i>Plectus</i>          | <i>Plectus murrayi</i>               | 538668 | 2591         |
| PPN                        | <i>Meloidogyne</i>      | <i>Meloidogyne javanica</i>          | 6303   | 7587         |
| PPN                        | <i>Meloidogyne</i>      | <i>Meloidogyne arenaria</i>          | 6304   | 5042         |
| PPN                        | <i>Meloidogyne</i>      | <i>Meloidogyne hapla</i>             | 6305   | 24452        |
| PPN                        | <i>Meloidogyne</i>      | <i>Meloidogyne incognita</i>         | 6306   | 63838        |
| PPN                        | <i>Bursaphelenchus</i>  | <i>Bursaphelenchus mucronatus</i>    | 6325   | 3193         |
| PPN                        | <i>Bursaphelenchus</i>  | <i>Bursaphelenchus xylophilus</i>    | 6326   | 14059        |
| PPN                        | <i>Globodera</i>        | <i>Globodera rostochiensis</i>       | 31243  | 11851        |
| PPN                        | <i>Heterodera</i>       | <i>Heterodera avenae</i>             | 34510  | 27766        |
| PPN                        | <i>Globodera</i>        | <i>Globodera pallida</i>             | 36090  | 9020         |
| PPN                        | <i>Pratylenchus</i>     | <i>Pratylenchus penetrans</i>        | 45929  | 1916         |
| PPN                        | <i>Pratylenchus</i>     | <i>Pratylenchus vulnus</i>           | 45931  | 5812         |
| PPN                        | <i>Pratylenchus</i>     | <i>Pratylenchus thornei</i>          | 45935  | 6667         |
| PPN                        | <i>Xiphinema</i>        | <i>Xiphinema index</i>               | 46003  | 9351         |
| PPN                        | <i>Radopholus</i>       | <i>Radopholus similis</i>            | 46012  | 7382         |
| PPN                        | <i>Heterodera</i>       | <i>Heterodera glycines</i>           | 51029  | 24444        |
| PPN                        | <i>Meloidogyne</i>      | <i>Meloidogyne chitwoodi</i>         | 59747  | 12218        |
| PPN                        | <i>Aphelenchus</i>      | <i>Aphelenchus avenae</i>            | 70226  | 5119         |
| PPN                        | <i>Heterodera</i>       | <i>Heterodera schachtii</i>          | 97005  | 2812         |
| PPN                        | <i>Anguina</i>          | <i>Anguina tritici</i>               | 166006 | 59           |
| PPN                        | <i>Globodera</i>        | <i>Globodera mexicana</i>            | 182293 | 17           |
| PPN                        | <i>Meloidogyne</i>      | <i>Meloidogyne paranaensis</i>       | 189293 | 3710         |
| PPN                        | <i>Rotylenchulus</i>    | <i>Rotylenchulus reniformis</i>      | 239373 | 2004         |
| PPN                        | <i>Ditylenchus</i>      | <i>Ditylenchus africanus</i>         | 490491 | 4847         |
| PPN                        | <i>Dictyocaulus</i>     | <i>Ditylenchus destructor</i>        | 166010 | 9800         |
| APN                        | <i>Strongyloides</i>    | <i>Strongyloides stercoralis</i>     | 6248   | 11392        |
| APN                        | <i>Ascaris</i>          | <i>Ascaris lumbricoides</i>          | 6252   | 1822         |
| APN                        | <i>Ascaris</i>          | <i>Ascaris suum</i>                  | 6253   | 56616        |
| APN                        | <i>Toxocara</i>         | <i>Toxocara canis</i>                | 6265   | 5089         |
| APN                        | <i>Anisakis</i>         | <i>Anisakis simplex</i>              | 6269   | 475          |
| APN                        | <i>Brugia</i>           | <i>Brugia malayi</i>                 | 6279   | 26215        |
| APN                        | <i>Brugia</i>           | <i>Brugia pahangi</i>                | 6280   | 28           |
| APN                        | <i>Onchocerca</i>       | <i>Onchocerca volvulus</i>           | 6282   | 14974        |
| APN                        | <i>Dirofilaria</i>      | <i>Dirofilaria immitis</i>           | 6287   | 4005         |
| APN                        | <i>Haemonchus</i>       | <i>Haemonchus contortus</i>          | 6289   | 21975        |
| APN                        | <i>Wuchereria</i>       | <i>Wuchereria bancrofti</i>          | 6293   | 4847         |
| APN                        | <i>Angiostrongylus</i>  | <i>Angiostrongylus cantonensis</i>   | 6313   | 2622         |
| APN                        | <i>Ostertagia</i>       | <i>Ostertagia ostertagi</i>          | 6317   | 7006         |
| APN                        | <i>Trichinella</i>      | <i>Trichinella spiralis</i>          | 6334   | 25301        |
| APN                        | <i>Trichinella</i>      | <i>Trichinella pseudospiralis</i>    | 6337   | 17330        |
| APN                        | <i>Loa</i>              | <i>Loa loa</i>                       | 7209   | 4173         |
| APN                        | <i>Nippostrongylus</i>  | <i>Nippostrongylus brasiliensis</i>  | 27835  | 14686        |
| APN                        | <i>Ancylostoma</i>      | <i>Ancylostoma caninum</i>           | 29170  | 80905        |
| APN                        | <i>Dictyocaulus</i>     | <i>Dictyocaulus viviparus</i>        | 29172  | 7917         |
| APN                        | <i>Strongyloides</i>    | <i>Strongyloides ratti</i>           | 34506  | 27366        |
| APN                        | <i>Steinernema</i>      | <i>Steinernema carpocapsae</i>       | 34508  | 2218         |
| APN                        | <i>Heterorhabditis</i>  | <i>Heterorhabditis bacteriophora</i> | 37862  | 53614        |
| APN                        | <i>Trichostrongylus</i> | <i>Trichostrongylus vitrinus</i>     | 40352  | 368          |
| APN                        | <i>Litomosoides</i>     | <i>Litomosoides sigmodontis</i>      | 42156  | 2699         |
| APN                        | <i>Onchocerca</i>       | <i>Onchocerca ochengi</i>            | 42157  | 60           |
| APN                        | <i>Teladorsagia</i>     | <i>Teladorsagia circumcincta</i>     | 45464  | 6061         |

|     |                            |                                     |        |       |
|-----|----------------------------|-------------------------------------|--------|-------|
| APN | <i>Necator</i>             | <i>Necator americanus</i>           | 51031  | 6694  |
| APN | <i>Steinernema</i>         | <i>Steinernema feltiae</i>          | 52066  | 83    |
| APN | <i>Ancylostoma</i>         | <i>Ancylostoma ceylanicum</i>       | 53326  | 10651 |
| APN | <i>Toxascaris</i>          | <i>Toxascaris leonina</i>           | 59264  | 439   |
| APN | <i>Oesophagostomum</i>     | <i>Oesophagostomum dentatum</i>     | 61180  | 299   |
| APN | <i>Trichuris</i>           | <i>Trichuris muris</i>              | 70415  | 7102  |
| APN | <i>Strongyloides</i>       | <i>Strongyloides venezuelensis</i>  | 75913  | 408   |
| APN | <i>Parastrongyloides</i>   | <i>Parastrongyloides trichosuri</i> | 131310 | 7963  |
| APN | <i>Parelaphostrongylus</i> | <i>Parelaphostrongylus tenuis</i>   | 148309 | 99    |
| APN | <i>Trichuris</i>           | <i>Trichuris vulpis</i>             | 219738 | 3063  |
| APN | <i>Mecistocirrus</i>       | <i>Mecistocirrus digitatus</i>      | 237660 | 1     |
| APN | <i>Ancylostoma</i>         | <i>Ancylostoma braziliense</i>      | 369059 | 20    |
| APN | <i>Onchocerca</i>          | <i>Onchocerca flexuosa</i>          | 387005 | 2124  |
| APN | <i>Anguillicoloides</i>    | <i>Anguillicoloides crassus</i>     | 620897 | 128   |
