# Supplementary material for: Comparative analysis of pre- and post-parasitic transcriptomes and mining pioneer effectors of Heterodera avenae
Source: PubMed Central journal article supplement (PMC5309974; doi:10.1186/s13578-017-0138-6), 2017-02-14

**Additional file 5: Figure S3.** Transcriptomes comparison of *H. avenae* at pre-parasitic and post-parasitic stages. (A-B) Dot plots show the distributions of contig lengths and abundances in transcriptomes of *H. avenae* before (A) and after (B) parasitism. (C) MA-plot shows differential expression of genes before and after parasitism. The M is the reads number ratio and the A is the average. Red dots, genes with significantly higher expression at pre-parasitic stages; Blue dots, genes with significantly higher expression at post-parasitic stages (FDR < 0.001). The dotted lines indicate the M values as -1, 0 and 1.

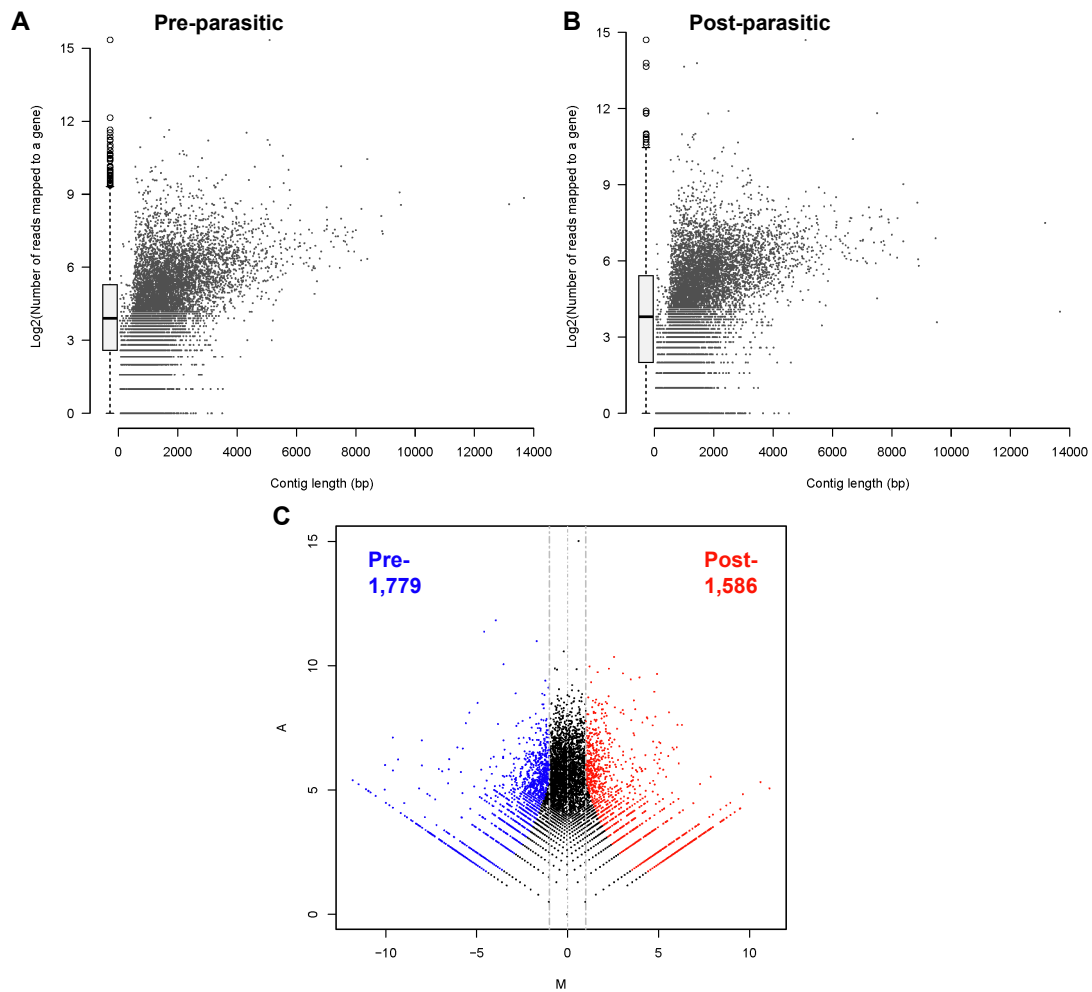

Supplement: 13578_2017_138_MOESM5_ESM.pdf [file 13578_2017_138_MOESM5_ESM.pdf]
