# Supplementary material for: Comparative analysis of pre- and post-parasitic transcriptomes and mining pioneer effectors of Heterodera avenae
Source: PubMed Central journal article supplement (PMC5309974; doi:10.1186/s13578-017-0138-6), 2017-02-14

**Additional file 6: Figure S4.** Heat map depicting the expression profiles of crosstalks genes relevant to the KEGG pathways significantly enriched before and after parasitism in *H. avenae*. The first box of each row marks the enrichment of crosstalk at either pre-parasitic stages (purple) or post-parasitic stages (green). Each red box denotes a single gene with higher expression at pre-parasitic stages; each blue box denotes a single gene with higher expression at post-parasitic stages. The darkness of the color is positively correlated with the absolute value of fold change, which is calculated as  $\log_2(\text{pre-parasitic RPKM}/\text{post-parasitic RPKM})$  with DEGseq.

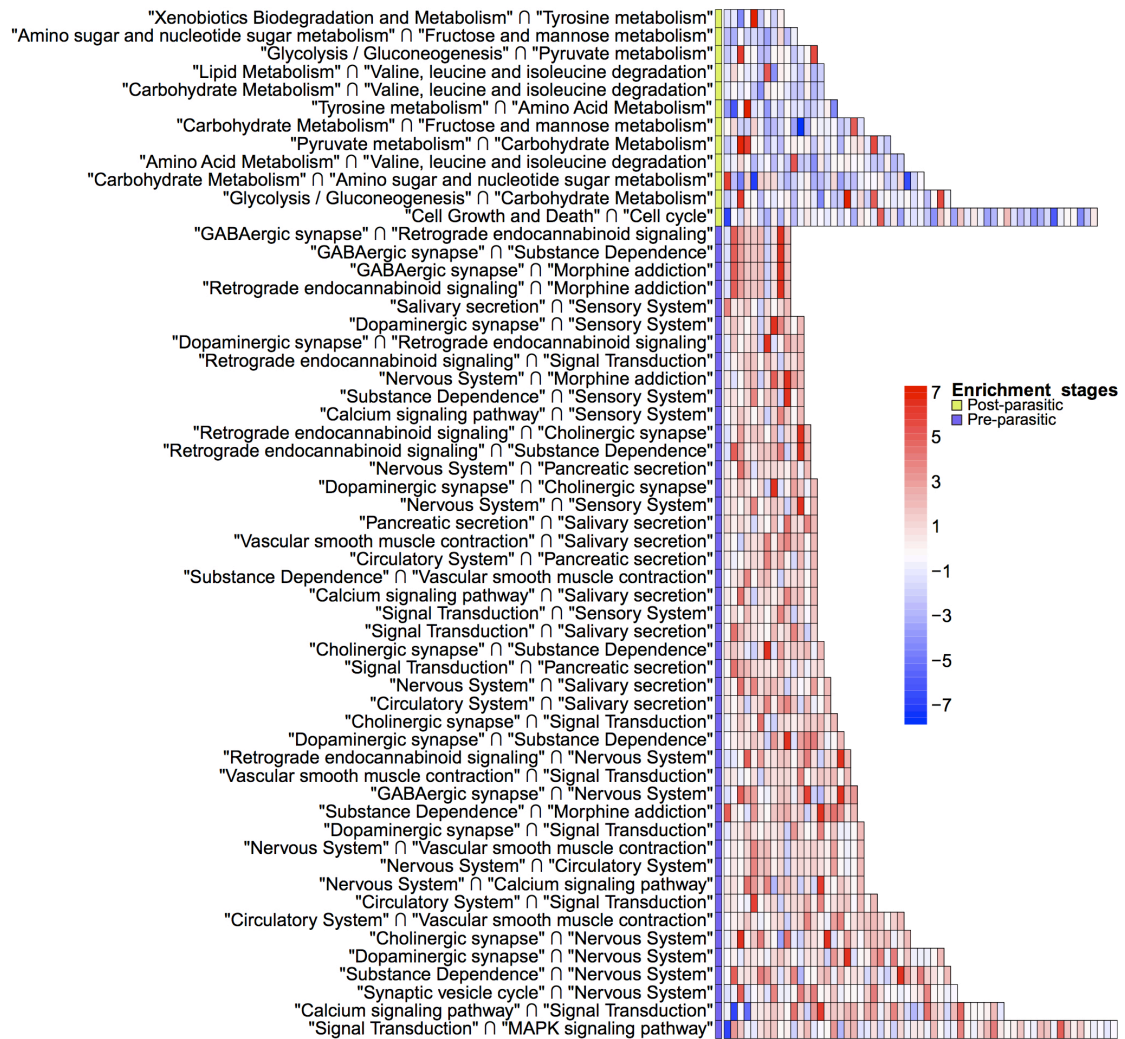

Supplement: 13578_2017_138_MOESM6_ESM.pdf [file 13578_2017_138_MOESM6_ESM.pdf]
