# Supplementary material for: Comparative analysis of pre- and post-parasitic transcriptomes and mining pioneer effectors of Heterodera avenae
Source: PubMed Central journal article supplement (PMC5309974; doi:10.1186/s13578-017-0138-6), 2017-02-14
Supplement: 13578_2017_138_MOESM7_ESM.pdf [file 13578_2017_138_MOESM7_ESM.pdf]

**Additional file 7: Table S3.** The list of differentially expressed genes in each node from the *H. avenae* KEGG pathways enriched crosstalks. The 'Log<sub>2</sub>(Fold change) Pre/Post' means the normalized Log<sub>2</sub>(pre-parasitic RPKM/post-parasitic RPKM) of each contig. Both Log<sub>2</sub>(Fold change) and Q value threshold were calculated by DEGseq. Some contigs might be presented in multiple crosstalk nodes.

| Crosstalks type | Crosstalks node           | KO number of KEGG | CCN contig  | Log <sub>2</sub> (Fold change) Pre/Post | Q value   |
|-----------------|---------------------------|-------------------|-------------|-----------------------------------------|-----------|
| Pre             | Calcium signaling pathway | K02183            | isotig10702 | 3.67                                    | 5.23E-04  |
| Pre             | Calcium signaling pathway | K02677            | isotig08175 | 1.89                                    | 4.34E-15  |
| Pre             | Calcium signaling pathway | K04131            | isotig15521 | 4.29                                    | 1.12E-05  |
| Pre             | Calcium signaling pathway | K04163            | isotig18466 | 4.43                                    | 6.94E-04  |
| Pre             | Calcium signaling pathway | K04345            | isotig08250 | -1.94                                   | 3.80E-12  |
| Pre             | Calcium signaling pathway | K04345            | isotig02324 | 1.78                                    | 2.56E-20  |
| Pre             | Calcium signaling pathway | K04348            | isotig05039 | 3.1                                     | 1.80E-14  |
| Pre             | Calcium signaling pathway | K04361            | isotig14617 | -6.42                                   | 5.25E-11  |
| Pre             | Calcium signaling pathway | K04962            | isotig13331 | 2.69                                    | 9.99E-13  |
| Pre             | Calcium signaling pathway | K05327            | isotig13387 | 1.71                                    | 5.66E-04  |
| Pre             | Calcium signaling pathway | K05858            | isotig03047 | 1.1                                     | 2.44E-07  |
| Pre             | Calcium signaling pathway | K05860            | isotig13702 | 2.78                                    | 1.24E-04  |
| Pre             | Calcium signaling pathway | K05863            | isotig16228 | -5.35                                   | 1.31E-10  |
| Pre             | Calcium signaling pathway | K05863            | isotig16053 | 2.25                                    | 1.56E-116 |
| Pre             | Calcium signaling pathway | K05863            | isotig16273 | 4.71                                    | 1.20E-48  |
| Pre             | Calcium signaling pathway | K08049            | isotig02947 | 2                                       | 3.38E-21  |
| Pre             | Calcium signaling pathway | K13755            | isotig08310 | 4.29                                    | 1.12E-05  |
| Pre             | Calcium signaling pathway | K16056            | isotig10128 | -1.61                                   | 1.66E-04  |
| Pre             | Cholinergic synapse       | K02677            | isotig08175 | 1.89                                    | 4.34E-15  |
| Pre             | Cholinergic synapse       | K04131            | isotig15521 | 4.29                                    | 1.12E-05  |
| Pre             | Cholinergic synapse       | K04345            | isotig08250 | -1.94                                   | 3.80E-12  |
| Pre             | Cholinergic synapse       | K04345            | isotig02324 | 1.78                                    | 2.56E-20  |
| Pre             | Cholinergic synapse       | K04368            | isotig05365 | 1.42                                    | 9.34E-05  |
| Pre             | Cholinergic synapse       | K04539            | isotig08600 | 2.97                                    | 2.65E-05  |
| Pre             | Cholinergic synapse       | K04630            | isotig08244 | -1.29                                   | 4.52E-07  |
| Pre             | Cholinergic synapse       | K04926            | isotig04414 | 2.12                                    | 7.18E-05  |

|     |                      |        |             |       |           |
|-----|----------------------|--------|-------------|-------|-----------|
| Pre | Cholinergic synapse  | K05858 | isotig03047 | 1.1   | 2.44E-07  |
| Pre | Cholinergic synapse  | K08049 | isotig02947 | 2     | 3.38E-21  |
| Pre | Cholinergic synapse  | K14387 | isotig16478 | 5.36  | 3.24E-06  |
| Pre | Cholinergic synapse  | K14636 | isotig14851 | 4.06  | 5.82E-05  |
| Pre | Circulatory System   | K00412 | isotig12250 | 4.56  | 4.01E-04  |
| Pre | Circulatory System   | K01047 | isotig04965 | 1.17  | 4.69E-04  |
| Pre | Circulatory System   | K01539 | isotig13411 | -1.51 | 1.88E-04  |
| Pre | Circulatory System   | K02183 | isotig10702 | 3.67  | 5.23E-04  |
| Pre | Circulatory System   | K02263 | isotig19203 | -3.73 | 4.35E-04  |
| Pre | Circulatory System   | K02265 | isotig19199 | -2.28 | 4.50E-06  |
| Pre | Circulatory System   | K02677 | isotig08175 | 1.89  | 4.34E-15  |
| Pre | Circulatory System   | K04345 | isotig08250 | -1.94 | 3.80E-12  |
| Pre | Circulatory System   | K04345 | isotig02324 | 1.78  | 2.56E-20  |
| Pre | Circulatory System   | K04368 | isotig05365 | 1.42  | 9.34E-05  |
| Pre | Circulatory System   | K04936 | isotig13985 | 3.93  | 1.32E-07  |
| Pre | Circulatory System   | K04962 | isotig13331 | 2.69  | 9.99E-13  |
| Pre | Circulatory System   | K05858 | isotig03047 | 1.1   | 2.44E-07  |
| Pre | Circulatory System   | K06068 | isotig04374 | 1.73  | 1.66E-11  |
| Pre | Circulatory System   | K06068 | isotig03922 | 1.25  | 5.41E-07  |
| Pre | Circulatory System   | K08049 | isotig02947 | 2     | 3.38E-21  |
| Pre | Circulatory System   | K09290 | isotig12004 | 4.39  | 2.33E-237 |
| Pre | Circulatory System   | K12319 | isotig15721 | 2.97  | 1.54E-06  |
| Pre | Circulatory System   | K12323 | isotig08178 | 1.53  | 3.89E-08  |
| Pre | Dopaminergic synapse | K02183 | isotig10702 | 3.67  | 5.23E-04  |
| Pre | Dopaminergic synapse | K02677 | isotig08175 | 1.89  | 4.34E-15  |
| Pre | Dopaminergic synapse | K04345 | isotig08250 | -1.94 | 3.80E-12  |
| Pre | Dopaminergic synapse | K04345 | isotig02324 | 1.78  | 2.56E-20  |
| Pre | Dopaminergic synapse | K04348 | isotig05039 | 3.1   | 1.80E-14  |
| Pre | Dopaminergic synapse | K04440 | isotig14539 | -1.19 | 1.17E-05  |
| Pre | Dopaminergic synapse | K04539 | isotig08600 | 2.97  | 2.65E-05  |
| Pre | Dopaminergic synapse | K04630 | isotig08244 | -1.29 | 4.52E-07  |
| Pre | Dopaminergic synapse | K05858 | isotig03047 | 1.1   | 2.44E-07  |

|     |                        |        |             |       |          |
|-----|------------------------|--------|-------------|-------|----------|
| Pre | Dopaminergic synapse   | K08155 | isotig10076 | 3.97  | 5.09E-11 |
| Pre | Dopaminergic synapse   | K11583 | isotig05144 | 1.21  | 6.68E-07 |
| Pre | GABAergic synapse      | K01425 | isotig16061 | 4.78  | 1.36E-04 |
| Pre | GABAergic synapse      | K01915 | isotig11444 | -2.66 | 5.78E-06 |
| Pre | GABAergic synapse      | K02677 | isotig08175 | 1.89  | 4.34E-15 |
| Pre | GABAergic synapse      | K04345 | isotig02324 | 1.78  | 2.56E-20 |
| Pre | GABAergic synapse      | K04345 | isotig08250 | -1.94 | 3.80E-12 |
| Pre | GABAergic synapse      | K04539 | isotig08600 | 2.97  | 2.65E-05 |
| Pre | GABAergic synapse      | K05034 | isotig13994 | 3.29  | 1.32E-13 |
| Pre | GABAergic synapse      | K08049 | isotig02947 | 2     | 3.38E-21 |
| Pre | GABAergic synapse      | K15015 | isotig14774 | 4.56  | 4.01E-04 |
| Pre | GABAergic synapse      | K15375 | isotig07308 | 2.89  | 1.77E-15 |
| Pre | MAPK signaling pathway | K01047 | isotig04965 | 1.17  | 4.69E-04 |
| Pre | MAPK signaling pathway | K02677 | isotig08175 | 1.89  | 4.34E-15 |
| Pre | MAPK signaling pathway | K03099 | isotig08975 | 2.25  | 6.33E-22 |
| Pre | MAPK signaling pathway | K04345 | isotig02324 | 1.78  | 2.56E-20 |
| Pre | MAPK signaling pathway | K04345 | isotig08250 | -1.94 | 3.80E-12 |
| Pre | MAPK signaling pathway | K04348 | isotig05039 | 3.1   | 1.80E-14 |
| Pre | MAPK signaling pathway | K04358 | isotig11638 | 3.24  | 1.87E-06 |
| Pre | MAPK signaling pathway | K04361 | isotig14617 | -6.42 | 5.25E-11 |
| Pre | MAPK signaling pathway | K04364 | isotig17494 | -1.57 | 6.90E-04 |
| Pre | MAPK signaling pathway | K04368 | isotig05365 | 1.42  | 9.34E-05 |
| Pre | MAPK signaling pathway | K04375 | isotig13308 | -1.03 | 4.75E-04 |
| Pre | MAPK signaling pathway | K04392 | isotig15866 | -1.32 | 3.14E-05 |
| Pre | MAPK signaling pathway | K04440 | isotig14539 | -1.19 | 1.17E-05 |
| Pre | MAPK signaling pathway | K04459 | isotig16388 | 5.14  | 1.78E-09 |
| Pre | MAPK signaling pathway | K04459 | isotig15433 | 1.81  | 7.06E-06 |
| Pre | MAPK signaling pathway | K04463 | isotig14730 | 1.78  | 6.09E-04 |
| Pre | MAPK signaling pathway | K04674 | isotig14825 | -1.92 | 4.30E-05 |
| Pre | MAPK signaling pathway | K05315 | isotig14666 | 3.73  | 1.21E-06 |
| Pre | MAPK signaling pathway | K05316 | isotig05441 | 4     | 3.44E-21 |
| Pre | Morphine addiction     | K01120 | isotig08927 | 3.08  | 9.95E-13 |

|     |                    |        |             |       |          |
|-----|--------------------|--------|-------------|-------|----------|
| Pre | Morphine addiction | K01120 | isotig11262 | 3.56  | 6.18E-06 |
| Pre | Morphine addiction | K02677 | isotig08175 | 1.89  | 4.34E-15 |
| Pre | Morphine addiction | K04345 | isotig02324 | 1.78  | 2.56E-20 |
| Pre | Morphine addiction | K04345 | isotig08250 | -1.94 | 3.80E-12 |
| Pre | Morphine addiction | K04539 | isotig08600 | 2.97  | 2.65E-05 |
| Pre | Morphine addiction | K08049 | isotig02947 | 2     | 3.38E-21 |
| Pre | Morphine addiction | K13296 | isotig04542 | 2.45  | 2.79E-25 |
| Pre | Morphine addiction | K13755 | isotig08310 | 4.29  | 1.12E-05 |
| Pre | Morphine addiction | K15015 | isotig14774 | 4.56  | 4.01E-04 |
| Pre | Nervous System     | K01047 | isotig04965 | 1.17  | 4.69E-04 |
| Pre | Nervous System     | K01115 | isotig13270 | -1.56 | 1.95E-09 |
| Pre | Nervous System     | K01425 | isotig16061 | 4.78  | 1.36E-04 |
| Pre | Nervous System     | K01528 | isotig02826 | 1.27  | 4.00E-18 |
| Pre | Nervous System     | K01915 | isotig11444 | -2.66 | 5.78E-06 |
| Pre | Nervous System     | K02152 | isotig19022 | 3.67  | 2.07E-06 |
| Pre | Nervous System     | K02183 | isotig10702 | 3.67  | 5.23E-04 |
| Pre | Nervous System     | K02677 | isotig08175 | 1.89  | 4.34E-15 |
| Pre | Nervous System     | K03099 | isotig08975 | 2.25  | 6.33E-22 |
| Pre | Nervous System     | K04131 | isotig15521 | 4.29  | 1.12E-05 |
| Pre | Nervous System     | K04153 | isotig10656 | 2.47  | 9.12E-04 |
| Pre | Nervous System     | K04163 | isotig18466 | 4.43  | 6.94E-04 |
| Pre | Nervous System     | K04345 | isotig02324 | 1.78  | 2.56E-20 |
| Pre | Nervous System     | K04345 | isotig08250 | -1.94 | 3.80E-12 |
| Pre | Nervous System     | K04348 | isotig05039 | 3.1   | 1.80E-14 |
| Pre | Nervous System     | K04364 | isotig17494 | -1.57 | 6.90E-04 |
| Pre | Nervous System     | K04368 | isotig05365 | 1.42  | 9.34E-05 |
| Pre | Nervous System     | K04392 | isotig15866 | -1.32 | 3.14E-05 |
| Pre | Nervous System     | K04440 | isotig14539 | -1.19 | 1.17E-05 |
| Pre | Nervous System     | K04463 | isotig14730 | 1.78  | 6.09E-04 |
| Pre | Nervous System     | K04505 | isotig03446 | 1.03  | 3.58E-08 |
| Pre | Nervous System     | K04539 | isotig08600 | 2.97  | 2.65E-05 |
| Pre | Nervous System     | K04630 | isotig08244 | -1.29 | 4.52E-07 |

|     |                      |        |             |       |          |
|-----|----------------------|--------|-------------|-------|----------|
| Pre | Nervous System       | K04646 | isotig13231 | -1.75 | 5.92E-26 |
| Pre | Nervous System       | K04926 | isotig04414 | 2.12  | 7.18E-05 |
| Pre | Nervous System       | K05034 | isotig13994 | 3.29  | 1.32E-13 |
| Pre | Nervous System       | K05858 | isotig03047 | 1.1   | 2.44E-07 |
| Pre | Nervous System       | K06619 | isotig13791 | 1.56  | 1.66E-04 |
| Pre | Nervous System       | K07293 | isotig01787 | 1.71  | 3.33E-24 |
| Pre | Nervous System       | K07413 | isotig15601 | -4.12 | 4.65E-05 |
| Pre | Nervous System       | K07882 | isotig15140 | 3.85  | 4.82E-10 |
| Pre | Nervous System       | K08049 | isotig02947 | 2     | 3.38E-21 |
| Pre | Nervous System       | K08155 | isotig10076 | 3.97  | 5.09E-11 |
| Pre | Nervous System       | K11583 | isotig05144 | 1.21  | 6.68E-07 |
| Pre | Nervous System       | K12302 | isotig17247 | 4.14  | 3.35E-05 |
| Pre | Nervous System       | K12319 | isotig15721 | 2.97  | 1.54E-06 |
| Pre | Nervous System       | K12460 | isotig05593 | 1.08  | 2.43E-05 |
| Pre | Nervous System       | K14387 | isotig16478 | 5.36  | 3.24E-06 |
| Pre | Nervous System       | K14636 | isotig14851 | 4.06  | 5.82E-05 |
| Pre | Nervous System       | K15015 | isotig14774 | 4.56  | 4.01E-04 |
| Pre | Nervous System       | K15293 | isotig08831 | 1.76  | 9.82E-05 |
| Pre | Nervous System       | K15296 | isotig15948 | -1.41 | 1.50E-05 |
| Pre | Nervous System       | K15375 | isotig07308 | 2.89  | 1.77E-15 |
| Pre | Nervous System       | K16172 | isotig07261 | 1.31  | 9.10E-09 |
| Pre | Pancreatic secretion | K01539 | isotig13411 | -1.51 | 1.88E-04 |
| Pre | Pancreatic secretion | K02677 | isotig08175 | 1.89  | 4.34E-15 |
| Pre | Pancreatic secretion | K04131 | isotig15521 | 4.29  | 1.12E-05 |
| Pre | Pancreatic secretion | K04392 | isotig15866 | -1.32 | 3.14E-05 |
| Pre | Pancreatic secretion | K04926 | isotig04414 | 2.12  | 7.18E-05 |
| Pre | Pancreatic secretion | K04936 | isotig13985 | 3.93  | 1.32E-07 |
| Pre | Pancreatic secretion | K04962 | isotig13331 | 2.69  | 9.99E-13 |
| Pre | Pancreatic secretion | K05858 | isotig03047 | 1.1   | 2.44E-07 |
| Pre | Pancreatic secretion | K07904 | isotig16757 | -1.93 | 6.15E-07 |
| Pre | Pancreatic secretion | K07904 | isotig16854 | -2.47 | 1.27E-13 |
| Pre | Pancreatic secretion | K08049 | isotig02947 | 2     | 3.38E-21 |

|     |                                      |        |             |       |          |
|-----|--------------------------------------|--------|-------------|-------|----------|
| Pre | Retrograde endocannabinoid signaling | K02677 | isotig08175 | 1.89  | 4.34E-15 |
| Pre | Retrograde endocannabinoid signaling | K04345 | isotig02324 | 1.78  | 2.56E-20 |
| Pre | Retrograde endocannabinoid signaling | K04345 | isotig08250 | -1.94 | 3.80E-12 |
| Pre | Retrograde endocannabinoid signaling | K04440 | isotig14539 | -1.19 | 1.17E-05 |
| Pre | Retrograde endocannabinoid signaling | K04539 | isotig08600 | 2.97  | 2.65E-05 |
| Pre | Retrograde endocannabinoid signaling | K05858 | isotig03047 | 1.1   | 2.44E-07 |
| Pre | Retrograde endocannabinoid signaling | K08049 | isotig02947 | 2     | 3.38E-21 |
| Pre | Retrograde endocannabinoid signaling | K12302 | isotig17247 | 4.14  | 3.35E-05 |
| Pre | Retrograde endocannabinoid signaling | K15015 | isotig14774 | 4.56  | 4.01E-04 |
| Pre | Salivary secretion                   | K01539 | isotig13411 | -1.51 | 1.88E-04 |
| Pre | Salivary secretion                   | K02183 | isotig10702 | 3.67  | 5.23E-04 |
| Pre | Salivary secretion                   | K02677 | isotig08175 | 1.89  | 4.34E-15 |
| Pre | Salivary secretion                   | K04131 | isotig15521 | 4.29  | 1.12E-05 |
| Pre | Salivary secretion                   | K04345 | isotig02324 | 1.78  | 2.56E-20 |
| Pre | Salivary secretion                   | K04345 | isotig08250 | -1.94 | 3.80E-12 |
| Pre | Salivary secretion                   | K04936 | isotig13985 | 3.93  | 1.32E-07 |
| Pre | Salivary secretion                   | K05858 | isotig03047 | 1.1   | 2.44E-07 |
| Pre | Salivary secretion                   | K08049 | isotig02947 | 2     | 3.38E-21 |
| Pre | Salivary secretion                   | K12319 | isotig15721 | 2.97  | 1.54E-06 |
| Pre | Sensory System                       | K02183 | isotig10702 | 3.67  | 5.23E-04 |
| Pre | Sensory System                       | K02677 | isotig08175 | 1.89  | 4.34E-15 |
| Pre | Sensory System                       | K04345 | isotig02324 | 1.78  | 2.56E-20 |
| Pre | Sensory System                       | K04345 | isotig08250 | -1.94 | 3.80E-12 |

|     |                     |        |             |       |          |
|-----|---------------------|--------|-------------|-------|----------|
| Pre | Sensory System      | K05692 | isotig15184 | -1.32 | 1.43E-32 |
| Pre | Sensory System      | K05692 | isotig06868 | 4.77  | 0.00E+00 |
| Pre | Sensory System      | K05858 | isotig03047 | 1.1   | 2.44E-07 |
| Pre | Signal Transduction | K00412 | isotig12250 | 4.56  | 4.01E-04 |
| Pre | Signal Transduction | K00626 | isotig14729 | -2.19 | 1.20E-20 |
| Pre | Signal Transduction | K00889 | isotig10052 | -1.84 | 3.22E-07 |
| Pre | Signal Transduction | K00901 | isotig05537 | 2.74  | 2.32E-17 |
| Pre | Signal Transduction | K01047 | isotig04965 | 1.17  | 4.69E-04 |
| Pre | Signal Transduction | K01099 | isotig09832 | 2.39  | 1.85E-07 |
| Pre | Signal Transduction | K01915 | isotig11444 | -2.66 | 5.78E-06 |
| Pre | Signal Transduction | K02105 | isotig13760 | -1.19 | 4.38E-06 |
| Pre | Signal Transduction | K02183 | isotig10702 | 3.67  | 5.23E-04 |
| Pre | Signal Transduction | K02599 | isotig14622 | -3.94 | 1.42E-04 |
| Pre | Signal Transduction | K02677 | isotig08175 | 1.89  | 4.34E-15 |
| Pre | Signal Transduction | K02991 | isotig19150 | 4.67  | 2.33E-04 |
| Pre | Signal Transduction | K03097 | isotig08256 | 1.33  | 1.50E-11 |
| Pre | Signal Transduction | K03099 | isotig08975 | 2.25  | 6.33E-22 |
| Pre | Signal Transduction | K03259 | isotig11110 | -1.23 | 8.67E-06 |
| Pre | Signal Transduction | K03868 | isotig19452 | -2.43 | 2.64E-06 |
| Pre | Signal Transduction | K04131 | isotig15521 | 4.29  | 1.12E-05 |
| Pre | Signal Transduction | K04163 | isotig18466 | 4.43  | 6.94E-04 |
| Pre | Signal Transduction | K04345 | isotig02324 | 1.78  | 2.56E-20 |
| Pre | Signal Transduction | K04345 | isotig08250 | -1.94 | 3.80E-12 |
| Pre | Signal Transduction | K04348 | isotig05039 | 3.1   | 1.80E-14 |
| Pre | Signal Transduction | K04358 | isotig11638 | 3.24  | 1.87E-06 |
| Pre | Signal Transduction | K04364 | isotig17494 | -1.57 | 6.90E-04 |
| Pre | Signal Transduction | K04368 | isotig05365 | 1.42  | 9.34E-05 |
| Pre | Signal Transduction | K04375 | isotig13308 | -1.03 | 4.75E-04 |
| Pre | Signal Transduction | K04392 | isotig15866 | -1.32 | 3.14E-05 |
| Pre | Signal Transduction | K04440 | isotig14539 | -1.19 | 1.17E-05 |
| Pre | Signal Transduction | K04446 | isotig07756 | -1.68 | 8.36E-07 |
| Pre | Signal Transduction | K04459 | isotig16388 | 5.14  | 1.78E-09 |

|     |                      |        |             |       |           |
|-----|----------------------|--------|-------------|-------|-----------|
| Pre | Signal Transduction  | K04459 | isotig15433 | 1.81  | 7.06E-06  |
| Pre | Signal Transduction  | K04463 | isotig14730 | 1.78  | 6.09E-04  |
| Pre | Signal Transduction  | K04500 | isotig07964 | 2.08  | 1.80E-11  |
| Pre | Signal Transduction  | K04501 | isotig13571 | -3.06 | 4.46E-15  |
| Pre | Signal Transduction  | K04505 | isotig03446 | 1.03  | 3.58E-08  |
| Pre | Signal Transduction  | K04512 | isotig13510 | -3.84 | 4.77E-07  |
| Pre | Signal Transduction  | K04674 | isotig14825 | -1.92 | 4.30E-05  |
| Pre | Signal Transduction  | K04962 | isotig13331 | 2.69  | 9.99E-13  |
| Pre | Signal Transduction  | K05315 | isotig14666 | 3.73  | 1.21E-06  |
| Pre | Signal Transduction  | K05316 | isotig05441 | 4     | 3.44E-21  |
| Pre | Signal Transduction  | K05327 | isotig13387 | 1.71  | 5.66E-04  |
| Pre | Signal Transduction  | K05760 | isotig11130 | 2.03  | 1.36E-06  |
| Pre | Signal Transduction  | K05858 | isotig03047 | 1.1   | 2.44E-07  |
| Pre | Signal Transduction  | K05860 | isotig13702 | 2.78  | 1.24E-04  |
| Pre | Signal Transduction  | K05863 | isotig16228 | -5.35 | 1.31E-10  |
| Pre | Signal Transduction  | K05863 | isotig16053 | 2.25  | 1.56E-116 |
| Pre | Signal Transduction  | K05863 | isotig16273 | 4.71  | 1.20E-48  |
| Pre | Signal Transduction  | K06058 | isotig09500 | -1.86 | 4.86E-08  |
| Pre | Signal Transduction  | K06171 | isotig13855 | -1.14 | 7.95E-06  |
| Pre | Signal Transduction  | K06619 | isotig13791 | 1.56  | 1.66E-04  |
| Pre | Signal Transduction  | K07293 | isotig01787 | 1.71  | 3.33E-24  |
| Pre | Signal Transduction  | K07298 | isotig14684 | -1.61 | 9.99E-05  |
| Pre | Signal Transduction  | K08049 | isotig02947 | 2     | 3.38E-21  |
| Pre | Signal Transduction  | K08960 | isotig15816 | -2.39 | 5.20E-10  |
| Pre | Signal Transduction  | K10151 | isotig16594 | -3.61 | 7.60E-04  |
| Pre | Signal Transduction  | K12646 | isotig06081 | -1.53 | 1.81E-12  |
| Pre | Signal Transduction  | K13711 | isotig14389 | -2.06 | 2.82E-06  |
| Pre | Signal Transduction  | K13711 | isotig05661 | -1.33 | 5.95E-04  |
| Pre | Signal Transduction  | K13755 | isotig08310 | 4.29  | 1.12E-05  |
| Pre | Signal Transduction  | K15759 | isotig09342 | 1.76  | 7.10E-08  |
| Pre | Signal Transduction  | K16056 | isotig10128 | -1.61 | 1.66E-04  |
| Pre | Substance Dependence | K01120 | isotig08927 | 3.08  | 9.95E-13  |



|     |                        |        |             |       |          |
|-----|------------------------|--------|-------------|-------|----------|
| Pre | Substance Dependence   | K01120 | isotig11262 | 3.56  | 6.18E-06 |
| Pre | Substance Dependence   | K02183 | isotig10702 | 3.67  | 5.23E-04 |
| Pre | Substance Dependence   | K02677 | isotig08175 | 1.89  | 4.34E-15 |
| Pre | Substance Dependence   | K03099 | isotig08975 | 2.25  | 6.33E-22 |
| Pre | Substance Dependence   | K04345 | isotig02324 | 1.78  | 2.56E-20 |
| Pre | Substance Dependence   | K04345 | isotig08250 | -1.94 | 3.80E-12 |
| Pre | Substance Dependence   | K04348 | isotig05039 | 3.1   | 1.80E-14 |
| Pre | Substance Dependence   | K04364 | isotig17494 | -1.57 | 6.90E-04 |
| Pre | Substance Dependence   | K04368 | isotig05365 | 1.42  | 9.34E-05 |
| Pre | Substance Dependence   | K04539 | isotig08600 | 2.97  | 2.65E-05 |
| Pre | Substance Dependence   | K04630 | isotig08244 | -1.29 | 4.52E-07 |
| Pre | Substance Dependence   | K07359 | isotig12228 | 3.88  | 1.74E-04 |
| Pre | Substance Dependence   | K08049 | isotig02947 | 2     | 3.38E-21 |
| Pre | Substance Dependence   | K08155 | isotig10076 | 3.97  | 5.09E-11 |
| Pre | Substance Dependence   | K11252 | isotig19182 | 4.97  | 4.65E-05 |
| Pre | Substance Dependence   | K11253 | isotig19439 | -4.73 | 1.99E-04 |
| Pre | Substance Dependence   | K11253 | isotig19510 | -4.28 | 1.52E-05 |
| Pre | Substance Dependence   | K11254 | isotig16986 | 1.4   | 1.34E-04 |
| Pre | Substance Dependence   | K12302 | isotig17247 | 4.14  | 3.35E-05 |
| Pre | Substance Dependence   | K13296 | isotig04542 | 2.45  | 2.79E-25 |
| Pre | Substance Dependence   | K13755 | isotig08310 | 4.29  | 1.12E-05 |
| Pre | Substance Dependence   | K15015 | isotig14774 | 4.56  | 4.01E-04 |
| Pre | Synaptic vesicle cycle | K01528 | isotig02826 | 1.27  | 4.00E-18 |
| Pre | Synaptic vesicle cycle | K02152 | isotig19022 | 3.67  | 2.07E-06 |
| Pre | Synaptic vesicle cycle | K04646 | isotig13231 | -1.75 | 5.92E-26 |
| Pre | Synaptic vesicle cycle | K07882 | isotig15140 | 3.85  | 4.82E-10 |
| Pre | Synaptic vesicle cycle | K08155 | isotig10076 | 3.97  | 5.09E-11 |
| Pre | Synaptic vesicle cycle | K12302 | isotig17247 | 4.14  | 3.35E-05 |
| Pre | Synaptic vesicle cycle | K14636 | isotig14851 | 4.06  | 5.82E-05 |
| Pre | Synaptic vesicle cycle | K15015 | isotig14774 | 4.56  | 4.01E-04 |
| Pre | Synaptic vesicle cycle | K15293 | isotig08831 | 1.76  | 9.82E-05 |
| Pre | Vascular smooth muscle | K02183 | isotig10702 | 3.67  | 5.23E-04 |

|      |                                    |        |             |       |          |
|------|------------------------------------|--------|-------------|-------|----------|
|      | contraction                        |        |             |       |          |
| Pre  | Vascular smooth muscle contraction | K02677 | isotig08175 | 1.89  | 4.34E-15 |
| Pre  | Vascular smooth muscle contraction | K04345 | isotig02324 | 1.78  | 2.56E-20 |
| Pre  | Vascular smooth muscle contraction | K04345 | isotig08250 | -1.94 | 3.80E-12 |
| Pre  | Vascular smooth muscle contraction | K04368 | isotig05365 | 1.42  | 9.34E-05 |
| Pre  | Vascular smooth muscle contraction | K04936 | isotig13985 | 3.93  | 1.32E-07 |
| Pre  | Vascular smooth muscle contraction | K05858 | isotig03047 | 1.1   | 2.44E-07 |
| Pre  | Vascular smooth muscle contraction | K06068 | isotig04374 | 1.73  | 1.66E-11 |
| Pre  | Vascular smooth muscle contraction | K06068 | isotig03922 | 1.25  | 5.41E-07 |
| Pre  | Vascular smooth muscle contraction | K08049 | isotig02947 | 2     | 3.38E-21 |
| Pre  | Vascular smooth muscle contraction | K12319 | isotig15721 | 2.97  | 1.54E-06 |
| Pre  | Vascular smooth muscle contraction | K12323 | isotig08178 | 1.53  | 3.89E-08 |
| Post | Amino Acid Metabolism              | K00022 | isotig15495 | -4.06 | 1.94E-70 |
| Post | Amino Acid Metabolism              | K00128 | isotig09962 | -2.22 | 9.34E-15 |
| Post | Amino Acid Metabolism              | K00129 | isotig14559 | -4.27 | 2.26E-58 |
| Post | Amino Acid Metabolism              | K00143 | isotig06177 | -1.01 | 4.91E-05 |
| Post | Amino Acid Metabolism              | K00162 | isotig15346 | -2.46 | 4.42E-05 |
| Post | Amino Acid Metabolism              | K00252 | isotig06497 | -1.64 | 1.47E-09 |
| Post | Amino Acid Metabolism              | K00253 | isotig10260 | -1.85 | 4.00E-05 |
| Post | Amino Acid Metabolism              | K00264 | isotig04549 | 1.09  | 1.33E-11 |
| Post | Amino Acid Metabolism              | K00272 | isotig04789 | 1.86  | 6.37E-04 |

|      |                       |        |             |       |           |
|------|-----------------------|--------|-------------|-------|-----------|
| Post | Amino Acid Metabolism | K00281 | isotig14245 | -3.03 | 1.88E-05  |
| Post | Amino Acid Metabolism | K00286 | isotig01155 | 1.56  | 5.23E-23  |
| Post | Amino Acid Metabolism | K00382 | isotig14339 | -2.11 | 3.92E-18  |
| Post | Amino Acid Metabolism | K00457 | isotig09530 | -3.84 | 4.68E-21  |
| Post | Amino Acid Metabolism | K00472 | isotig09722 | -2.06 | 5.41E-19  |
| Post | Amino Acid Metabolism | K00472 | isotig14476 | -7.05 | 8.02E-16  |
| Post | Amino Acid Metabolism | K00472 | isotig14283 | -5.42 | 2.60E-06  |
| Post | Amino Acid Metabolism | K00493 | isotig14601 | -4.94 | 6.67E-05  |
| Post | Amino Acid Metabolism | K00505 | isotig07711 | -6.06 | 4.86E-202 |
| Post | Amino Acid Metabolism | K00505 | isotig13471 | -2.12 | 1.62E-08  |
| Post | Amino Acid Metabolism | K00549 | isotig13593 | -3.57 | 1.05E-14  |
| Post | Amino Acid Metabolism | K00599 | isotig16397 | -2.41 | 7.18E-05  |
| Post | Amino Acid Metabolism | K00599 | isotig11948 | -1.99 | 4.55E-05  |
| Post | Amino Acid Metabolism | K00600 | isotig11198 | -1.7  | 8.13E-10  |
| Post | Amino Acid Metabolism | K00626 | isotig14729 | -2.19 | 1.20E-20  |
| Post | Amino Acid Metabolism | K00657 | isotig15794 | -2.78 | 1.39E-05  |
| Post | Amino Acid Metabolism | K00789 | isotig07993 | -1.95 | 1.04E-18  |
| Post | Amino Acid Metabolism | K00797 | isotig16616 | -5.12 | 2.24E-05  |
| Post | Amino Acid Metabolism | K00815 | isotig13862 | -3.87 | 1.23E-24  |
| Post | Amino Acid Metabolism | K00820 | isotig13749 | -7.21 | 1.98E-33  |
| Post | Amino Acid Metabolism | K00827 | isotig06701 | -4.86 | 3.13E-14  |
| Post | Amino Acid Metabolism | K00934 | isotig08028 | 2.09  | 3.47E-86  |
| Post | Amino Acid Metabolism | K01011 | isotig11596 | 3.73  | 9.06E-12  |
| Post | Amino Acid Metabolism | K01425 | isotig16061 | 4.78  | 1.36E-04  |
| Post | Amino Acid Metabolism | K01555 | isotig03152 | -1.22 | 4.54E-07  |
| Post | Amino Acid Metabolism | K01641 | isotig14068 | -1.88 | 1.35E-07  |
| Post | Amino Acid Metabolism | K01697 | isotig09350 | -1.21 | 1.01E-05  |
| Post | Amino Acid Metabolism | K01697 | isotig13714 | -1.79 | 2.46E-08  |
| Post | Amino Acid Metabolism | K01738 | isotig16370 | -2.03 | 1.74E-06  |
| Post | Amino Acid Metabolism | K01758 | isotig10842 | -3.06 | 4.56E-19  |
| Post | Amino Acid Metabolism | K01915 | isotig11444 | -2.66 | 5.78E-06  |
| Post | Amino Acid Metabolism | K01953 | isotig14208 | -1.87 | 7.04E-13  |

|      |                                                |        |             |       |          |
|------|------------------------------------------------|--------|-------------|-------|----------|
| Post | Amino Acid Metabolism                          | K06101 | isotig13232 | 1.84  | 1.47E-19 |
| Post | Amino Acid Metabolism                          | K07508 | isotig11546 | 1.16  | 1.71E-09 |
| Post | Amino Acid Metabolism                          | K08660 | isotig14577 | -2.58 | 9.06E-18 |
| Post | Amino Acid Metabolism                          | K09699 | isotig11326 | -2.39 | 4.31E-06 |
| Post | Amino Acid Metabolism                          | K09880 | isotig08715 | 2.63  | 3.42E-04 |
| Post | Amino Acid Metabolism                          | K11419 | isotig09704 | -1.7  | 2.09E-04 |
| Post | Amino Acid Metabolism                          | K11420 | isotig08337 | -1.36 | 5.88E-07 |
| Post | Amino Acid Metabolism                          | K11424 | isotig13821 | -3.73 | 4.61E-09 |
| Post | Amino Acid Metabolism                          | K11538 | isotig15134 | -3    | 8.97E-17 |
| Post | Amino Acid Metabolism                          | K13647 | isotig09138 | -1.97 | 2.30E-08 |
| Post | Amino Acid Metabolism                          | K13953 | isotig17766 | 5.78  | 8.58E-08 |
| Post | Amino Acid Metabolism                          | K14455 | isotig14718 | -1.24 | 7.24E-05 |
| Post | Amino Acid Metabolism                          | K15633 | isotig14097 | -1.14 | 4.18E-05 |
| Post | Amino sugar and nucleotide<br>sugar metabolism | K00012 | isotig06369 | 1.06  | 2.97E-04 |
| Post | Amino sugar and nucleotide<br>sugar metabolism | K00621 | isotig18963 | -4.73 | 1.99E-04 |
| Post | Amino sugar and nucleotide<br>sugar metabolism | K00698 | isotig09218 | -4.73 | 1.44E-30 |
| Post | Amino sugar and nucleotide<br>sugar metabolism | K00820 | isotig13749 | -7.21 | 1.98E-33 |
| Post | Amino sugar and nucleotide<br>sugar metabolism | K00844 | isotig14064 | -2.21 | 2.76E-07 |
| Post | Amino sugar and nucleotide<br>sugar metabolism | K00966 | isotig09908 | -2.53 | 1.04E-10 |
| Post | Amino sugar and nucleotide<br>sugar metabolism | K00966 | isotig14721 | -1.71 | 3.02E-05 |
| Post | Amino sugar and nucleotide<br>sugar metabolism | K01183 | isotig14312 | -2.53 | 7.16E-04 |
| Post | Amino sugar and nucleotide<br>sugar metabolism | K01784 | isotig15366 | -1.87 | 1.90E-08 |
| Post | Amino sugar and nucleotide                     | K01835 | isotig05893 | 1.1   | 8.67E-06 |

|      |                                                |        |             |       |          |
|------|------------------------------------------------|--------|-------------|-------|----------|
|      | sugar metabolism                               |        |             |       |          |
| Post | Amino sugar and nucleotide<br>sugar metabolism | K01836 | isotig09654 | -1.76 | 1.86E-09 |
| Post | Amino sugar and nucleotide<br>sugar metabolism | K01840 | isotig16968 | -3.2  | 1.22E-04 |
| Post | Amino sugar and nucleotide<br>sugar metabolism | K02377 | isotig15639 | -1.72 | 5.88E-04 |
| Post | Amino sugar and nucleotide<br>sugar metabolism | K05305 | isotig09448 | -3.47 | 1.49E-62 |
| Post | Amino sugar and nucleotide<br>sugar metabolism | K12373 | isotig14029 | -2.98 | 3.35E-15 |
| Post | Carbohydrate Metabolism                        | K00012 | isotig06369 | 1.06  | 2.97E-04 |
| Post | Carbohydrate Metabolism                        | K00022 | isotig15495 | -4.06 | 1.94E-70 |
| Post | Carbohydrate Metabolism                        | K00026 | isotig15407 | -1.49 | 1.64E-04 |
| Post | Carbohydrate Metabolism                        | K00030 | isotig14644 | 1.13  | 1.95E-04 |
| Post | Carbohydrate Metabolism                        | K00030 | isotig15956 | -1.27 | 5.21E-05 |
| Post | Carbohydrate Metabolism                        | K00033 | isotig14147 | -1.46 | 7.53E-09 |
| Post | Carbohydrate Metabolism                        | K00045 | isotig14267 | -7.6  | 1.10E-21 |
| Post | Carbohydrate Metabolism                        | K00128 | isotig09962 | -2.22 | 9.34E-15 |
| Post | Carbohydrate Metabolism                        | K00129 | isotig14559 | -4.27 | 2.26E-58 |
| Post | Carbohydrate Metabolism                        | K00162 | isotig15346 | -2.46 | 4.42E-05 |
| Post | Carbohydrate Metabolism                        | K00382 | isotig14339 | -2.11 | 3.92E-18 |
| Post | Carbohydrate Metabolism                        | K00600 | isotig11198 | -1.7  | 8.13E-10 |
| Post | Carbohydrate Metabolism                        | K00615 | isotig13839 | -1.9  | 2.66E-17 |
| Post | Carbohydrate Metabolism                        | K00621 | isotig18963 | -4.73 | 1.99E-04 |
| Post | Carbohydrate Metabolism                        | K00626 | isotig14729 | -2.19 | 1.20E-20 |
| Post | Carbohydrate Metabolism                        | K00627 | isotig13822 | -1.15 | 8.08E-05 |
| Post | Carbohydrate Metabolism                        | K00693 | isotig09718 | -1.12 | 6.44E-06 |
| Post | Carbohydrate Metabolism                        | K00698 | isotig09218 | -4.73 | 1.44E-30 |
| Post | Carbohydrate Metabolism                        | K00699 | isotig05471 | 2.23  | 9.48E-10 |
| Post | Carbohydrate Metabolism                        | K00820 | isotig13749 | -7.21 | 1.98E-33 |
| Post | Carbohydrate Metabolism                        | K00844 | isotig14064 | -2.21 | 2.76E-07 |

|      |                         |        |             |       |          |
|------|-------------------------|--------|-------------|-------|----------|
| Post | Carbohydrate Metabolism | K00850 | isotig09210 | -1.95 | 2.75E-18 |
| Post | Carbohydrate Metabolism | K00873 | isotig14289 | -2.48 | 1.99E-20 |
| Post | Carbohydrate Metabolism | K00889 | isotig10052 | -1.84 | 3.22E-07 |
| Post | Carbohydrate Metabolism | K00966 | isotig09908 | -2.53 | 1.04E-10 |
| Post | Carbohydrate Metabolism | K00966 | isotig14721 | -1.71 | 3.02E-05 |
| Post | Carbohydrate Metabolism | K01099 | isotig09832 | 2.39  | 1.85E-07 |
| Post | Carbohydrate Metabolism | K01103 | isotig06209 | 1.33  | 4.40E-05 |
| Post | Carbohydrate Metabolism | K01179 | isotig14720 | 7.19  | 1.05E-33 |
| Post | Carbohydrate Metabolism | K01183 | isotig14312 | -2.53 | 7.16E-04 |
| Post | Carbohydrate Metabolism | K01194 | isotig13930 | -4.21 | 1.49E-24 |
| Post | Carbohydrate Metabolism | K01194 | isotig14140 | -3.42 | 2.36E-05 |
| Post | Carbohydrate Metabolism | K01610 | isotig16257 | 4.56  | 4.01E-04 |
| Post | Carbohydrate Metabolism | K01637 | isotig14870 | 4.56  | 4.01E-04 |
| Post | Carbohydrate Metabolism | K01638 | isotig10314 | 6.53  | 6.79E-12 |
| Post | Carbohydrate Metabolism | K01641 | isotig14068 | -1.88 | 1.35E-07 |
| Post | Carbohydrate Metabolism | K01648 | isotig13341 | -2.68 | 1.33E-51 |
| Post | Carbohydrate Metabolism | K01689 | isotig14669 | -1.15 | 4.53E-17 |
| Post | Carbohydrate Metabolism | K01784 | isotig15366 | -1.87 | 1.90E-08 |
| Post | Carbohydrate Metabolism | K01835 | isotig05893 | 1.1   | 8.67E-06 |
| Post | Carbohydrate Metabolism | K01836 | isotig09654 | -1.76 | 1.86E-09 |
| Post | Carbohydrate Metabolism | K01840 | isotig16968 | -3.2  | 1.22E-04 |
| Post | Carbohydrate Metabolism | K01895 | isotig09700 | 6.1   | 2.49E-09 |
| Post | Carbohydrate Metabolism | K01899 | isotig15371 | 1.14  | 4.48E-05 |
| Post | Carbohydrate Metabolism | K01900 | isotig14845 | -1.14 | 5.80E-04 |
| Post | Carbohydrate Metabolism | K01915 | isotig11444 | -2.66 | 5.78E-06 |
| Post | Carbohydrate Metabolism | K02377 | isotig15639 | -1.72 | 5.88E-04 |
| Post | Carbohydrate Metabolism | K03841 | isotig05958 | -1.3  | 1.25E-11 |
| Post | Carbohydrate Metabolism | K05305 | isotig09448 | -3.47 | 1.49E-62 |
| Post | Carbohydrate Metabolism | K05858 | isotig03047 | 1.1   | 2.44E-07 |
| Post | Carbohydrate Metabolism | K05860 | isotig13702 | 2.78  | 1.24E-04 |
| Post | Carbohydrate Metabolism | K11262 | isotig03641 | -2.82 | 1.28E-33 |
| Post | Carbohydrate Metabolism | K12309 | isotig10126 | -4.42 | 4.94E-06 |

|      |                         |        |             |       |          |
|------|-------------------------|--------|-------------|-------|----------|
| Post | Carbohydrate Metabolism | K12373 | isotig14029 | -2.98 | 3.35E-15 |
| Post | Carbohydrate Metabolism | K13711 | isotig14389 | -2.06 | 2.82E-06 |
| Post | Carbohydrate Metabolism | K13711 | isotig05661 | -1.33 | 5.95E-04 |
| Post | Carbohydrate Metabolism | K13953 | isotig17766 | 5.78  | 8.58E-08 |
| Post | Carbohydrate Metabolism | K15633 | isotig14097 | -1.14 | 4.18E-05 |
| Post | Carbohydrate Metabolism | K15759 | isotig09342 | 1.76  | 7.10E-08 |
| Post | Cell cycle              | K02087 | isotig15766 | -2.67 | 3.92E-05 |
| Post | Cell cycle              | K02180 | isotig10474 | -2.16 | 1.86E-05 |
| Post | Cell cycle              | K02209 | isotig13773 | -4.16 | 8.96E-09 |
| Post | Cell cycle              | K02210 | isotig09692 | -1.78 | 9.18E-05 |
| Post | Cell cycle              | K02540 | isotig05633 | -1.53 | 2.36E-10 |
| Post | Cell cycle              | K02541 | isotig13735 | -1.12 | 4.03E-05 |
| Post | Cell cycle              | K02542 | isotig13631 | -3.28 | 3.68E-08 |
| Post | Cell cycle              | K03358 | isotig12128 | -2.73 | 2.34E-05 |
| Post | Cell cycle              | K03364 | isotig14041 | -1.09 | 9.91E-06 |
| Post | Cell cycle              | K03868 | isotig19452 | -2.43 | 2.64E-06 |
| Post | Cell cycle              | K03875 | isotig07946 | -3.35 | 4.12E-05 |
| Post | Cell cycle              | K04500 | isotig07964 | 2.08  | 1.80E-11 |
| Post | Cell cycle              | K04501 | isotig13571 | -3.06 | 4.46E-15 |
| Post | Cell cycle              | K04802 | isotig04819 | -1.64 | 3.72E-11 |
| Post | Cell cycle              | K05868 | isotig15274 | -4.45 | 9.32E-25 |
| Post | Cell cycle              | K06619 | isotig13791 | 1.56  | 1.66E-04 |
| Post | Cell cycle              | K06626 | isotig05737 | -5.35 | 4.43E-06 |
| Post | Cell cycle              | K06627 | isotig13667 | -3.49 | 1.29E-09 |
| Post | Cell cycle              | K06628 | isotig10620 | -1.53 | 6.07E-04 |
| Post | Cell cycle              | K06631 | isotig09584 | -2.84 | 5.45E-09 |
| Post | Cell cycle              | K06633 | isotig14206 | -3.95 | 5.31E-20 |
| Post | Cell cycle              | K06634 | isotig15993 | -1.54 | 2.15E-04 |
| Post | Cell cycle              | K06670 | isotig14224 | -2.03 | 2.88E-05 |
| Post | Cell cycle              | K10151 | isotig16594 | -3.61 | 7.60E-04 |
| Post | Cell Growth and Death   | K01011 | isotig11596 | 3.73  | 9.06E-12 |
| Post | Cell Growth and Death   | K01230 | isotig05069 | -2.11 | 1.72E-07 |

|      |                       |        |             |       |          |
|------|-----------------------|--------|-------------|-------|----------|
| Post | Cell Growth and Death | K01689 | isotig14669 | -1.15 | 4.53E-17 |
| Post | Cell Growth and Death | K01869 | isotig09194 | 1.47  | 8.98E-04 |
| Post | Cell Growth and Death | K01870 | isotig13419 | -1.38 | 5.72E-06 |
| Post | Cell Growth and Death | K01874 | isotig13483 | -1.17 | 1.35E-04 |
| Post | Cell Growth and Death | K01875 | isotig14848 | -1.71 | 1.56E-06 |
| Post | Cell Growth and Death | K01876 | isotig01106 | 1.12  | 3.89E-07 |
| Post | Cell Growth and Death | K01885 | isotig09784 | -1.27 | 1.20E-05 |
| Post | Cell Growth and Death | K01889 | isotig06673 | 1.57  | 1.26E-08 |
| Post | Cell Growth and Death | K02209 | isotig13773 | -4.16 | 8.96E-09 |
| Post | Cell Growth and Death | K02210 | isotig09692 | -1.78 | 9.18E-05 |
| Post | Cell Growth and Death | K02320 | isotig07358 | -1.25 | 6.22E-06 |
| Post | Cell Growth and Death | K02321 | isotig05059 | 1.28  | 5.17E-08 |
| Post | Cell Growth and Death | K02324 | isotig14972 | -3.94 | 1.42E-04 |
| Post | Cell Growth and Death | K02540 | isotig05633 | -1.53 | 2.36E-10 |
| Post | Cell Growth and Death | K02541 | isotig13735 | -1.12 | 4.03E-05 |
| Post | Cell Growth and Death | K02542 | isotig13631 | -3.28 | 3.68E-08 |
| Post | Cell Growth and Death | K02725 | isotig12414 | -1.46 | 2.48E-10 |
| Post | Cell Growth and Death | K02726 | isotig17342 | -2.27 | 5.67E-10 |
| Post | Cell Growth and Death | K02737 | isotig16429 | -1.08 | 7.42E-04 |
| Post | Cell Growth and Death | K02738 | isotig16918 | -1.38 | 1.31E-04 |
| Post | Cell Growth and Death | K02739 | isotig12252 | 1.59  | 9.51E-08 |
| Post | Cell Growth and Death | K02866 | isotig17899 | 1.57  | 1.17E-12 |
| Post | Cell Growth and Death | K02870 | isotig19382 | -1.73 | 9.76E-04 |
| Post | Cell Growth and Death | K02887 | isotig16605 | -2.73 | 2.34E-05 |
| Post | Cell Growth and Death | K02896 | isotig17810 | 1.31  | 2.01E-04 |
| Post | Cell Growth and Death | K02897 | isotig14470 | -5.78 | 1.09E-07 |
| Post | Cell Growth and Death | K02912 | isotig19212 | -1.51 | 2.69E-07 |
| Post | Cell Growth and Death | K02917 | isotig18131 | 5.26  | 3.55E-10 |
| Post | Cell Growth and Death | K02934 | isotig17195 | 1.28  | 1.70E-19 |
| Post | Cell Growth and Death | K02934 | isotig17388 | -1.41 | 2.88E-05 |
| Post | Cell Growth and Death | K02936 | isotig16774 | 1.07  | 7.74E-10 |
| Post | Cell Growth and Death | K02948 | isotig14490 | -2.54 | 5.90E-07 |



|      |                       |        |             |       |          |
|------|-----------------------|--------|-------------|-------|----------|
| Post | Cell Growth and Death | K02960 | isotig19406 | 1.63  | 1.25E-04 |
| Post | Cell Growth and Death | K02974 | isotig19035 | -1.1  | 3.36E-04 |
| Post | Cell Growth and Death | K02991 | isotig19150 | 4.67  | 2.33E-04 |
| Post | Cell Growth and Death | K02997 | isotig18548 | 1.52  | 1.78E-19 |
| Post | Cell Growth and Death | K03018 | isotig13246 | -1.11 | 6.59E-04 |
| Post | Cell Growth and Death | K03020 | isotig08137 | -1.4  | 2.49E-05 |
| Post | Cell Growth and Death | K03028 | isotig13575 | -1.55 | 1.14E-06 |
| Post | Cell Growth and Death | K03033 | isotig11658 | -1.03 | 3.42E-04 |
| Post | Cell Growth and Death | K03038 | isotig15747 | -1.02 | 7.54E-06 |
| Post | Cell Growth and Death | K03062 | contig01344 | -3.95 | 0.00E+00 |
| Post | Cell Growth and Death | K03097 | isotig08256 | 1.33  | 1.50E-11 |
| Post | Cell Growth and Death | K03107 | isotig16912 | 1.06  | 7.83E-05 |
| Post | Cell Growth and Death | K03130 | isotig07708 | 1.51  | 9.24E-11 |
| Post | Cell Growth and Death | K03137 | isotig16590 | -2.12 | 4.42E-07 |
| Post | Cell Growth and Death | K03165 | isotig13757 | -1.61 | 7.69E-04 |
| Post | Cell Growth and Death | K03178 | isotig13405 | -1.23 | 4.47E-08 |
| Post | Cell Growth and Death | K03231 | isotig15543 | 5.22  | 9.38E-06 |
| Post | Cell Growth and Death | K03241 | isotig09800 | -1.08 | 3.11E-05 |
| Post | Cell Growth and Death | K03247 | isotig15254 | -1.49 | 3.10E-05 |
| Post | Cell Growth and Death | K03259 | isotig11110 | -1.23 | 8.67E-06 |
| Post | Cell Growth and Death | K03260 | isotig14306 | -1.25 | 9.84E-04 |
| Post | Cell Growth and Death | K03264 | isotig12114 | -2.33 | 1.72E-12 |
| Post | Cell Growth and Death | K03265 | isotig10096 | -1.94 | 3.80E-12 |
| Post | Cell Growth and Death | K03267 | isotig15201 | -1.19 | 1.16E-04 |
| Post | Cell Growth and Death | K03358 | isotig12128 | -2.73 | 2.34E-05 |
| Post | Cell Growth and Death | K03364 | isotig14041 | -1.09 | 9.91E-06 |
| Post | Cell Growth and Death | K03514 | isotig14120 | -1.35 | 2.61E-05 |
| Post | Cell Growth and Death | K03539 | isotig16563 | -2.53 | 7.16E-04 |
| Post | Cell Growth and Death | K03679 | isotig16142 | -1.43 | 6.58E-04 |
| Post | Cell Growth and Death | K03868 | isotig19452 | -2.43 | 2.64E-06 |
| Post | Cell Growth and Death | K03875 | isotig07946 | -3.35 | 4.12E-05 |
| Post | Cell Growth and Death | K04440 | isotig14539 | -1.19 | 1.17E-05 |

|      |                       |        |             |       |           |
|------|-----------------------|--------|-------------|-------|-----------|
| Post | Cell Growth and Death | K04523 | isotig14054 | -1.25 | 5.57E-12  |
| Post | Cell Growth and Death | K04554 | isotig15673 | -1.08 | 2.22E-05  |
| Post | Cell Growth and Death | K04567 | isotig14388 | -1.75 | 2.45E-07  |
| Post | Cell Growth and Death | K04802 | isotig04819 | -1.64 | 3.72E-11  |
| Post | Cell Growth and Death | K05019 | isotig18485 | 1.86  | 6.37E-04  |
| Post | Cell Growth and Death | K05546 | isotig09021 | -1.64 | 6.32E-11  |
| Post | Cell Growth and Death | K06634 | isotig15993 | -1.54 | 2.15E-04  |
| Post | Cell Growth and Death | K06943 | isotig09466 | 1.89  | 5.48E-66  |
| Post | Cell Growth and Death | K07151 | isotig13389 | -1.45 | 6.49E-09  |
| Post | Cell Growth and Death | K07151 | isotig09144 | -2    | 1.29E-14  |
| Post | Cell Growth and Death | K07562 | isotig14040 | -1.44 | 1.21E-05  |
| Post | Cell Growth and Death | K08489 | isotig16027 | -1.7  | 2.09E-04  |
| Post | Cell Growth and Death | K08490 | isotig14840 | -1.93 | 2.19E-08  |
| Post | Cell Growth and Death | K08495 | isotig15031 | 1.23  | 6.15E-04  |
| Post | Cell Growth and Death | K08509 | isotig15489 | -1.13 | 2.94E-04  |
| Post | Cell Growth and Death | K08517 | isotig16798 | -2.77 | 1.82E-07  |
| Post | Cell Growth and Death | K08734 | isotig06477 | -1.74 | 1.73E-06  |
| Post | Cell Growth and Death | K09485 | isotig14420 | -1.18 | 1.16E-07  |
| Post | Cell Growth and Death | K09486 | isotig13892 | -1.4  | 3.55E-10  |
| Post | Cell Growth and Death | K09523 | isotig07699 | -1.26 | 9.62E-11  |
| Post | Cell Growth and Death | K09540 | isotig13550 | -1.87 | 8.11E-08  |
| Post | Cell Growth and Death | K09561 | isotig08739 | -1.16 | 3.63E-05  |
| Post | Cell Growth and Death | K09580 | isotig14036 | -1.39 | 5.53E-48  |
| Post | Cell Growth and Death | K10080 | isotig14296 | -2.31 | 2.80E-06  |
| Post | Cell Growth and Death | K10573 | isotig18694 | -2.28 | 7.64E-04  |
| Post | Cell Growth and Death | K10582 | isotig15108 | -2.3  | 6.44E-08  |
| Post | Cell Growth and Death | K10586 | isotig13420 | -1.69 | 1.18E-07  |
| Post | Cell Growth and Death | K10592 | isotig13237 | 1.34  | 8.90E-16  |
| Post | Cell Growth and Death | K10643 | isotig02131 | 3.03  | 1.24E-143 |
| Post | Cell Growth and Death | K10685 | isotig14182 | -1.03 | 1.22E-04  |
| Post | Cell Growth and Death | K10756 | isotig15750 | -1.51 | 1.88E-04  |
| Post | Cell Growth and Death | K10773 | isotig12166 | -2.13 | 7.55E-05  |

|      |                       |        |             |       |          |
|------|-----------------------|--------|-------------|-------|----------|
| Post | Cell Growth and Death | K10846 | isotig09168 | 1.25  | 1.30E-11 |
| Post | Cell Growth and Death | K10875 | isotig09192 | -4.46 | 9.26E-11 |
| Post | Cell Growth and Death | K11583 | isotig05144 | 1.21  | 6.68E-07 |
| Post | Cell Growth and Death | K11718 | isotig13229 | -1.59 | 2.44E-06 |
| Post | Cell Growth and Death | K12172 | isotig14246 | -1.25 | 7.34E-06 |
| Post | Cell Growth and Death | K12275 | isotig14521 | -1.68 | 3.77E-20 |
| Post | Cell Growth and Death | K12584 | isotig17252 | -2.38 | 8.90E-14 |
| Post | Cell Growth and Death | K12591 | isotig09200 | 1.43  | 3.13E-12 |
| Post | Cell Growth and Death | K12613 | isotig09492 | -1.78 | 1.33E-05 |
| Post | Cell Growth and Death | K12614 | isotig14198 | -1.03 | 9.48E-06 |
| Post | Cell Growth and Death | K12666 | isotig10230 | -1.17 | 1.61E-14 |
| Post | Cell Growth and Death | K12820 | isotig13798 | -1.1  | 2.82E-04 |
| Post | Cell Growth and Death | K12823 | isotig08511 | 1.94  | 1.53E-60 |
| Post | Cell Growth and Death | K12831 | isotig14849 | -2.64 | 1.86E-08 |
| Post | Cell Growth and Death | K12838 | isotig05019 | 1.1   | 6.42E-06 |
| Post | Cell Growth and Death | K12840 | isotig16867 | -1.23 | 7.02E-04 |
| Post | Cell Growth and Death | K12858 | isotig09428 | -1.03 | 4.75E-04 |
| Post | Cell Growth and Death | K12863 | isotig16247 | 1.05  | 2.19E-04 |
| Post | Cell Growth and Death | K12867 | isotig13513 | -1.11 | 1.06E-04 |
| Post | Cell Growth and Death | K12872 | isotig14883 | -1.35 | 1.88E-06 |
| Post | Cell Growth and Death | K12881 | isotig14940 | -1.12 | 3.96E-07 |
| Post | Cell Growth and Death | K12891 | isotig06924 | 1.74  | 4.21E-07 |
| Post | Cell Growth and Death | K13114 | isotig04729 | 2.08  | 2.82E-62 |
| Post | Cell Growth and Death | K13126 | isotig13759 | 1.21  | 9.82E-78 |
| Post | Cell Growth and Death | K13126 | isotig14448 | -3.58 | 2.40E-19 |
| Post | Cell Growth and Death | K13130 | isotig16834 | -2.57 | 2.41E-06 |
| Post | Cell Growth and Death | K13151 | isotig15468 | -1.33 | 7.07E-05 |
| Post | Cell Growth and Death | K13250 | isotig17616 | -1.24 | 2.71E-05 |
| Post | Cell Growth and Death | K13251 | isotig17940 | -2.69 | 5.19E-07 |
| Post | Cell Growth and Death | K13431 | isotig14019 | -1.08 | 7.42E-04 |
| Post | Cell Growth and Death | K13917 | isotig06525 | 1.6   | 2.11E-14 |
| Post | Cell Growth and Death | K13993 | isotig17002 | -4.94 | 3.26E-08 |

|      |                                    |        |             |       |          |
|------|------------------------------------|--------|-------------|-------|----------|
| Post | Cell Growth and Death              | K14006 | isotig13564 | -1.43 | 5.04E-08 |
| Post | Cell Growth and Death              | K14007 | isotig13426 | -1.4  | 7.76E-06 |
| Post | Cell Growth and Death              | K14010 | contig01758 | -4.59 | 0.00E+00 |
| Post | Cell Growth and Death              | K14026 | isotig13805 | -1.48 | 5.99E-09 |
| Post | Cell Growth and Death              | K14168 | isotig15251 | 1.13  | 1.36E-05 |
| Post | Cell Growth and Death              | K14283 | isotig15286 | -1.18 | 2.22E-04 |
| Post | Cell Growth and Death              | K14291 | isotig15059 | -1.85 | 1.25E-07 |
| Post | Cell Growth and Death              | K14292 | isotig14910 | -1.84 | 1.00E-04 |
| Post | Cell Growth and Death              | K14294 | isotig17147 | -2.21 | 2.76E-07 |
| Post | Cell Growth and Death              | K14298 | isotig15713 | -1.58 | 5.30E-05 |
| Post | Cell Growth and Death              | K14299 | isotig15623 | -1.61 | 7.69E-04 |
| Post | Cell Growth and Death              | K14315 | isotig06669 | -1.12 | 4.74E-05 |
| Post | Cell Growth and Death              | K14317 | isotig13325 | -1.01 | 1.53E-06 |
| Post | Cell Growth and Death              | K14406 | isotig06585 | -2.03 | 7.37E-05 |
| Post | Cell Growth and Death              | K14408 | isotig13783 | 1.07  | 1.59E-08 |
| Post | Cell Growth and Death              | K14416 | isotig10884 | -1.56 | 6.75E-07 |
| Post | Cell Growth and Death              | K14537 | isotig13790 | -1.3  | 1.42E-06 |
| Post | Cell Growth and Death              | K14539 | isotig06125 | -2.36 | 2.28E-28 |
| Post | Cell Growth and Death              | K14546 | isotig16786 | -1.73 | 9.76E-04 |
| Post | Cell Growth and Death              | K14553 | isotig11710 | 1.17  | 8.65E-06 |
| Post | Cell Growth and Death              | K14561 | isotig15848 | 1.77  | 7.58E-09 |
| Post | Cell Growth and Death              | K14650 | isotig13339 | 1.11  | 5.98E-10 |
| Post | Cell Growth and Death              | K14962 | isotig16322 | -2.98 | 1.68E-06 |
| Post | Cell Growth and Death              | K15363 | isotig03001 | 1.46  | 7.68E-18 |
| Post | Cell Growth and Death              | K15544 | isotig12456 | -2.66 | 5.78E-06 |
| Post | Fructose and mannose<br>metabolism | K00045 | isotig14267 | -7.6  | 1.10E-21 |
| Post | Fructose and mannose<br>metabolism | K00850 | isotig09210 | -1.95 | 2.75E-18 |
| Post | Fructose and mannose<br>metabolism | K00966 | isotig09908 | -2.53 | 1.04E-10 |
| Post | Fructose and mannose               | K00966 | isotig14721 | -1.71 | 3.02E-05 |

|      |                                    |        |             |       |          |
|------|------------------------------------|--------|-------------|-------|----------|
|      | metabolism                         |        |             |       |          |
| Post | Fructose and mannose<br>metabolism | K01103 | isotig06209 | 1.33  | 4.40E-05 |
| Post | Fructose and mannose<br>metabolism | K01840 | isotig16968 | -3.2  | 1.22E-04 |
| Post | Fructose and mannose<br>metabolism | K02377 | isotig15639 | -1.72 | 5.88E-04 |
| Post | Fructose and mannose<br>metabolism | K03841 | isotig05958 | -1.3  | 1.25E-11 |
| Post | Fructose and mannose<br>metabolism | K05305 | isotig09448 | -3.47 | 1.49E-62 |
| Post | Genetic information<br>processing  | K02087 | isotig15766 | -2.67 | 3.92E-05 |
| Post | Genetic information<br>processing  | K02180 | isotig10474 | -2.16 | 1.86E-05 |
| Post | Genetic information<br>processing  | K02183 | isotig10702 | 3.67  | 5.23E-04 |
| Post | Genetic information<br>processing  | K02209 | isotig13773 | -4.16 | 8.96E-09 |
| Post | Genetic information<br>processing  | K02210 | isotig09692 | -1.78 | 9.18E-05 |
| Post | Genetic information<br>processing  | K02540 | isotig05633 | -1.53 | 2.36E-10 |
| Post | Genetic information<br>processing  | K02541 | isotig13735 | -1.12 | 4.03E-05 |
| Post | Genetic information<br>processing  | K02542 | isotig13631 | -3.28 | 3.68E-08 |
| Post | Genetic information<br>processing  | K03358 | isotig12128 | -2.73 | 2.34E-05 |
| Post | Genetic information<br>processing  | K03364 | isotig14041 | -1.09 | 9.91E-06 |
| Post | Genetic information                | K03868 | isotig19452 | -2.43 | 2.64E-06 |

|      |                                   |        |             |       |          |
|------|-----------------------------------|--------|-------------|-------|----------|
|      | processing                        |        |             |       |          |
| Post | Genetic information<br>processing | K03875 | isotig07946 | -3.35 | 4.12E-05 |
| Post | Genetic information<br>processing | K04345 | isotig02324 | 1.78  | 2.56E-20 |
| Post | Genetic information<br>processing | K04345 | isotig08250 | -1.94 | 3.80E-12 |
| Post | Genetic information<br>processing | K04348 | isotig05039 | 3.1   | 1.80E-14 |
| Post | Genetic information<br>processing | K04368 | isotig05365 | 1.42  | 9.34E-05 |
| Post | Genetic information<br>processing | K04500 | isotig07964 | 2.08  | 1.80E-11 |
| Post | Genetic information<br>processing | K04501 | isotig13571 | -3.06 | 4.46E-15 |
| Post | Genetic information<br>processing | K04739 | isotig06637 | 2.11  | 6.92E-39 |
| Post | Genetic information<br>processing | K04802 | isotig04819 | -1.64 | 3.72E-11 |
| Post | Genetic information<br>processing | K05868 | isotig15963 | -5.84 | 6.44E-08 |
| Post | Genetic information<br>processing | K05868 | isotig15274 | -4.45 | 9.32E-25 |
| Post | Genetic information<br>processing | K06619 | isotig13791 | 1.56  | 1.66E-04 |
| Post | Genetic information<br>processing | K06626 | isotig05737 | -5.35 | 4.43E-06 |
| Post | Genetic information<br>processing | K06627 | isotig13667 | -3.49 | 1.29E-09 |
| Post | Genetic information<br>processing | K06628 | isotig10620 | -1.53 | 6.07E-04 |
| Post | Genetic information               | K06631 | isotig09584 | -2.84 | 5.45E-09 |

|      |                                   |        |             |       |          |
|------|-----------------------------------|--------|-------------|-------|----------|
|      | processing                        |        |             |       |          |
| Post | Genetic information<br>processing | K06633 | isotig14206 | -3.95 | 5.31E-20 |
| Post | Genetic information<br>processing | K06634 | isotig15993 | -1.54 | 2.15E-04 |
| Post | Genetic information<br>processing | K06670 | isotig14224 | -2.03 | 2.88E-05 |
| Post | Genetic information<br>processing | K08049 | isotig02947 | 2     | 3.38E-21 |
| Post | Genetic information<br>processing | K09175 | isotig08355 | 3.78  | 3.02E-04 |
| Post | Genetic information<br>processing | K10151 | isotig16594 | -3.61 | 7.60E-04 |
| Post | Genetic information<br>processing | K11481 | isotig16081 | -4.78 | 1.74E-07 |
| Post | Genetic information<br>processing | K11481 | isotig16435 | -2.4  | 1.76E-05 |
| Post | Glycolysis / Gluconeogenesis      | K00128 | isotig09962 | -2.22 | 9.34E-15 |
| Post | Glycolysis / Gluconeogenesis      | K00129 | isotig14559 | -4.27 | 2.26E-58 |
| Post | Glycolysis / Gluconeogenesis      | K00162 | isotig15346 | -2.46 | 4.42E-05 |
| Post | Glycolysis / Gluconeogenesis      | K00627 | isotig13822 | -1.15 | 8.08E-05 |
| Post | Glycolysis / Gluconeogenesis      | K00844 | isotig14064 | -2.21 | 2.76E-07 |
| Post | Glycolysis / Gluconeogenesis      | K00850 | isotig09210 | -1.95 | 2.75E-18 |
| Post | Glycolysis / Gluconeogenesis      | K00873 | isotig14289 | -2.48 | 1.99E-20 |
| Post | Glycolysis / Gluconeogenesis      | K01610 | isotig16257 | 4.56  | 4.01E-04 |
| Post | Glycolysis / Gluconeogenesis      | K01689 | isotig14669 | -1.15 | 4.53E-17 |
| Post | Glycolysis / Gluconeogenesis      | K01835 | isotig05893 | 1.1   | 8.67E-06 |
| Post | Glycolysis / Gluconeogenesis      | K01895 | isotig09700 | 6.1   | 2.49E-09 |
| Post | Glycolysis / Gluconeogenesis      | K03841 | isotig05958 | -1.3  | 1.25E-11 |
| Post | Glycolysis / Gluconeogenesis      | K13953 | isotig17766 | 5.78  | 8.58E-08 |
| Post | Glycolysis / Gluconeogenesis      | K15633 | isotig14097 | -1.14 | 4.18E-05 |
| Post | Lipid Metabolism                  | K00006 | isotig15788 | -2.05 | 1.68E-07 |

|      |                  |        |             |       |          |
|------|------------------|--------|-------------|-------|----------|
| Post | Lipid Metabolism | K00022 | isotig15495 | -4.06 | 1.94E-70 |
| Post | Lipid Metabolism | K00128 | isotig09962 | -2.22 | 9.34E-15 |
| Post | Lipid Metabolism | K00232 | isotig14004 | -3.12 | 3.33E-07 |
| Post | Lipid Metabolism | K00252 | isotig06497 | -1.64 | 1.47E-09 |
| Post | Lipid Metabolism | K00432 | isotig17231 | 4.96  | 5.47E-37 |
| Post | Lipid Metabolism | K00432 | isotig15233 | 2.1   | 2.62E-41 |
| Post | Lipid Metabolism | K00493 | isotig14601 | -4.94 | 6.67E-05 |
| Post | Lipid Metabolism | K00507 | isotig15805 | 4.88  | 7.89E-05 |
| Post | Lipid Metabolism | K00507 | isotig10762 | -1.44 | 1.59E-25 |
| Post | Lipid Metabolism | K00626 | isotig14729 | -2.19 | 1.20E-20 |
| Post | Lipid Metabolism | K00645 | isotig05972 | 1.69  | 3.51E-04 |
| Post | Lipid Metabolism | K00649 | isotig09634 | -1.95 | 7.04E-05 |
| Post | Lipid Metabolism | K00650 | isotig16510 | -3.84 | 2.50E-04 |
| Post | Lipid Metabolism | K00654 | isotig10028 | -1.38 | 2.51E-04 |
| Post | Lipid Metabolism | K00699 | isotig05471 | 2.23  | 9.48E-10 |
| Post | Lipid Metabolism | K00864 | isotig09958 | -2.07 | 6.97E-17 |
| Post | Lipid Metabolism | K00901 | isotig05537 | 2.74  | 2.32E-17 |
| Post | Lipid Metabolism | K00993 | isotig15000 | -2.2  | 1.20E-04 |
| Post | Lipid Metabolism | K01047 | isotig04965 | 1.17  | 4.69E-04 |
| Post | Lipid Metabolism | K01062 | isotig14457 | 1.6   | 2.46E-13 |
| Post | Lipid Metabolism | K01062 | isotig09412 | -1.37 | 9.48E-06 |
| Post | Lipid Metabolism | K01074 | isotig04510 | -1.35 | 9.76E-07 |
| Post | Lipid Metabolism | K01080 | isotig15255 | -4.08 | 1.06E-18 |
| Post | Lipid Metabolism | K01115 | isotig13270 | -1.56 | 1.95E-09 |
| Post | Lipid Metabolism | K01201 | isotig14368 | -3.42 | 2.36E-05 |
| Post | Lipid Metabolism | K01201 | isotig10400 | -2.41 | 3.27E-14 |
| Post | Lipid Metabolism | K01201 | isotig10384 | -1.73 | 9.76E-04 |
| Post | Lipid Metabolism | K01634 | isotig07786 | 2.68  | 7.58E-10 |
| Post | Lipid Metabolism | K01641 | isotig14068 | -1.88 | 1.35E-07 |
| Post | Lipid Metabolism | K01897 | isotig13742 | -2.21 | 3.97E-14 |
| Post | Lipid Metabolism | K01897 | isotig06457 | 1.03  | 2.48E-04 |
| Post | Lipid Metabolism | K01897 | isotig13685 | -1.08 | 1.54E-11 |



|      |                          |        |             |       |          |
|------|--------------------------|--------|-------------|-------|----------|
| Post | Lipid Metabolism         | K04710 | isotig11718 | -2.14 | 4.41E-13 |
| Post | Lipid Metabolism         | K04712 | isotig11364 | 1.12  | 9.95E-04 |
| Post | Lipid Metabolism         | K05309 | isotig10936 | -1.35 | 6.97E-06 |
| Post | Lipid Metabolism         | K07413 | isotig15601 | -4.12 | 4.65E-05 |
| Post | Lipid Metabolism         | K07424 | isotig10014 | 1.73  | 4.11E-08 |
| Post | Lipid Metabolism         | K07508 | isotig11546 | 1.16  | 1.71E-09 |
| Post | Lipid Metabolism         | K08743 | isotig15068 | 4.78  | 1.36E-04 |
| Post | Lipid Metabolism         | K08764 | isotig08223 | -1.47 | 5.57E-10 |
| Post | Lipid Metabolism         | K10251 | isotig11618 | 1.03  | 4.20E-05 |
| Post | Lipid Metabolism         | K10251 | isotig15865 | -3.14 | 2.80E-46 |
| Post | Lipid Metabolism         | K10257 | isotig15015 | -1.36 | 4.21E-06 |
| Post | Lipid Metabolism         | K10258 | isotig15329 | -2.26 | 1.88E-24 |
| Post | Lipid Metabolism         | K11155 | isotig13916 | -1.51 | 3.20E-09 |
| Post | Lipid Metabolism         | K11262 | isotig03641 | -2.82 | 1.28E-33 |
| Post | Lipid Metabolism         | K12309 | isotig10126 | -4.42 | 4.94E-06 |
| Post | Lipid Metabolism         | K12351 | isotig15242 | -1.27 | 6.13E-05 |
| Post | Lipid Metabolism         | K13356 | isotig14072 | -3.31 | 2.12E-08 |
| Post | Lipid Metabolism         | K13513 | isotig15131 | -1.66 | 3.14E-04 |
| Post | Lipid Metabolism         | K13516 | isotig16734 | -6.28 | 3.89E-10 |
| Post | Lipid Metabolism         | K13953 | isotig17766 | 5.78  | 8.58E-08 |
| Post | Other glycan degradation | K01201 | isotig10400 | -2.41 | 3.27E-14 |
| Post | Other glycan degradation | K01201 | isotig14368 | -3.42 | 2.36E-05 |
| Post | Other glycan degradation | K01201 | isotig10384 | -1.73 | 9.76E-04 |
| Post | Other glycan degradation | K01206 | isotig06593 | -3.33 | 8.54E-14 |
| Post | Other glycan degradation | K12309 | isotig10126 | -4.42 | 4.94E-06 |
| Post | Other glycan degradation | K12311 | isotig13439 | -6.52 | 1.19E-11 |
| Post | Other glycan degradation | K12373 | isotig14029 | -2.98 | 3.35E-15 |
| Post | Pyruvate metabolism      | K00026 | isotig15407 | -1.49 | 1.64E-04 |
| Post | Pyruvate metabolism      | K00128 | isotig09962 | -2.22 | 9.34E-15 |
| Post | Pyruvate metabolism      | K00162 | isotig15346 | -2.46 | 4.42E-05 |
| Post | Pyruvate metabolism      | K00626 | isotig14729 | -2.19 | 1.20E-20 |
| Post | Pyruvate metabolism      | K00627 | isotig13822 | -1.15 | 8.08E-05 |

|      |                                               |        |             |       |          |
|------|-----------------------------------------------|--------|-------------|-------|----------|
| Post | Pyruvate metabolism                           | K00873 | isotig14289 | -2.48 | 1.99E-20 |
| Post | Pyruvate metabolism                           | K01610 | isotig16257 | 4.56  | 4.01E-04 |
| Post | Pyruvate metabolism                           | K01638 | isotig10314 | 6.53  | 6.79E-12 |
| Post | Pyruvate metabolism                           | K01895 | isotig09700 | 6.1   | 2.49E-09 |
| Post | Pyruvate metabolism                           | K11262 | isotig03641 | -2.82 | 1.28E-33 |
| Post | Tyrosine metabolism                           | K00129 | isotig14559 | -4.27 | 2.26E-58 |
| Post | Tyrosine metabolism                           | K00457 | isotig09530 | -3.84 | 4.68E-21 |
| Post | Tyrosine metabolism                           | K00505 | isotig13471 | -2.12 | 1.62E-08 |
| Post | Tyrosine metabolism                           | K00599 | isotig16397 | -2.41 | 7.18E-05 |
| Post | Tyrosine metabolism                           | K00599 | isotig11948 | -1.99 | 4.55E-05 |
| Post | Tyrosine metabolism                           | K00815 | isotig13862 | -3.87 | 1.23E-24 |
| Post | Tyrosine metabolism                           | K01555 | isotig03152 | -1.22 | 4.54E-07 |
| Post | Tyrosine metabolism                           | K13953 | isotig17766 | 5.78  | 8.58E-08 |
| Post | Tyrosine metabolism                           | K14455 | isotig14718 | -1.24 | 7.24E-05 |
| Post | Valine, leucine and isoleucine<br>degradation | K00022 | isotig15495 | -4.06 | 1.94E-70 |
| Post | Valine, leucine and isoleucine<br>degradation | K00128 | isotig09962 | -2.22 | 9.34E-15 |
| Post | Valine, leucine and isoleucine<br>degradation | K00253 | isotig10260 | -1.85 | 4.00E-05 |
| Post | Valine, leucine and isoleucine<br>degradation | K00626 | isotig14729 | -2.19 | 1.20E-20 |
| Post | Valine, leucine and isoleucine<br>degradation | K01641 | isotig14068 | -1.88 | 1.35E-07 |
| Post | Valine, leucine and isoleucine<br>degradation | K07508 | isotig11546 | 1.16  | 1.71E-09 |
| Post | Valine, leucine and isoleucine<br>degradation | K09699 | isotig11326 | -2.39 | 4.31E-06 |
| Post | Valine, leucine and isoleucine<br>degradation | K11538 | isotig15134 | -3    | 8.97E-17 |
| Post | Xenobiotics Biodegradation<br>and Metabolism  | K00022 | isotig15495 | -4.06 | 1.94E-70 |

|      |                                              |        |             |       |          |
|------|----------------------------------------------|--------|-------------|-------|----------|
| Post | Xenobiotics Biodegradation<br>and Metabolism | K00088 | isotig06473 | -1.24 | 7.37E-08 |
| Post | Xenobiotics Biodegradation<br>and Metabolism | K00128 | isotig09962 | -2.22 | 9.34E-15 |
| Post | Xenobiotics Biodegradation<br>and Metabolism | K00129 | isotig14559 | -4.27 | 2.26E-58 |
| Post | Xenobiotics Biodegradation<br>and Metabolism | K00485 | isotig09806 | -6.66 | 6.62E-24 |
| Post | Xenobiotics Biodegradation<br>and Metabolism | K00493 | isotig14601 | -4.94 | 6.67E-05 |
| Post | Xenobiotics Biodegradation<br>and Metabolism | K00599 | isotig16397 | -2.41 | 7.18E-05 |
| Post | Xenobiotics Biodegradation<br>and Metabolism | K00599 | isotig11948 | -1.99 | 4.55E-05 |
| Post | Xenobiotics Biodegradation<br>and Metabolism | K00626 | isotig14729 | -2.19 | 1.20E-20 |
| Post | Xenobiotics Biodegradation<br>and Metabolism | K00699 | isotig05471 | 2.23  | 9.48E-10 |
| Post | Xenobiotics Biodegradation<br>and Metabolism | K01044 | isotig08022 | -2.89 | 4.84E-06 |
| Post | Xenobiotics Biodegradation<br>and Metabolism | K01101 | isotig15153 | -2.89 | 4.84E-06 |
| Post | Xenobiotics Biodegradation<br>and Metabolism | K01253 | isotig03597 | 1.47  | 6.10E-06 |
| Post | Xenobiotics Biodegradation<br>and Metabolism | K01464 | isotig14586 | -1.54 | 2.15E-04 |
| Post | Xenobiotics Biodegradation<br>and Metabolism | K01555 | isotig03152 | -1.22 | 4.54E-07 |
| Post | Xenobiotics Biodegradation<br>and Metabolism | K01951 | isotig13813 | -1.9  | 2.05E-08 |
| Post | Xenobiotics Biodegradation<br>and Metabolism | K07413 | isotig15601 | -4.12 | 4.65E-05 |

|      |                                              |        |             |       |          |
|------|----------------------------------------------|--------|-------------|-------|----------|
| Post | Xenobiotics Biodegradation<br>and Metabolism | K07424 | isotig10014 | 1.73  | 4.11E-08 |
| Post | Xenobiotics Biodegradation<br>and Metabolism | K07508 | isotig11546 | 1.16  | 1.71E-09 |
| Post | Xenobiotics Biodegradation<br>and Metabolism | K13421 | isotig14984 | -1.26 | 5.12E-04 |
| Post | Xenobiotics Biodegradation<br>and Metabolism | K13953 | isotig17766 | 5.78  | 8.58E-08 |
