# Supplementary material for: Comparative analysis of pre- and post-parasitic transcriptomes and mining pioneer effectors of Heterodera avenae
Source: Cell Biosci. 2017 Feb 14;7:11. doi: 10.1186/s13578-017-0138-6 (PMC5309974; doi:10.1186/s13578-017-0138-6)
Supplement: Supplementary file 8 — Additional file 8: Table S4. Putative phytonematode effectors identified in H. avenae. a Putative key genes based on blastx searching against other phytonematode effectors. b Carbohydrate-active enzymes with homology to those of other phytonematodes. * # CCN ESTs, number of ESTs in Cereal cyst nematode H. avenae. ‘Pre’ means significantly high expression in pre-parasitic stage; ‘Pre*’ means coding by singleton in pre-parasitic library. The singleton might be the gene with low expression and was sequenced only once. CBM, carbohydrate binding module; GH, glycoside hydrolase; GT, glycosyl transferase; PL, polysaccharide lysate. NR means non-redundant GenBank proteins database. [file 13578_2017_138_MOESM8_ESM.pdf]

**Additional file 8: Table S4.** Putative phytonematode effectors identified in *H. avenae*. (A) Putative key genes based on blastx searching against other phytonematode effectors. (B) Carbohydrate-active enzymes with homology to those of other phytonematodes. \* # CCN ESTs, number of ESTs in Cereal cyst nematode *H. avenae*. 'Pre' means significantly high expression in pre-parasitic stage; 'Pre\*' means coding by singleton in pre-parasitic library. The singleton might be the gene with low expression and was sequenced only once. CBM, carbohydrate binding module; GH, glycoside hydrolase; GT, glycosyl transferase; PL, polysaccharide lysate. NR means non-redundant GenBank proteins database.

**Table S4A.** Key genes as putative phytonematode effectors identified in *H. avenae* based on best blastx hits. Carbohydrate-active enzymes were not included in this list.

| Accession       | Description                                                   | Species                        | E value   | Max identity | # CCN ESTs* |
|-----------------|---------------------------------------------------------------|--------------------------------|-----------|--------------|-------------|
| AEG64708        | 14-3-3 protein                                                | <i>Heterodera glycines</i>     | 8.07E-168 | 99%          | 2           |
| AIA08665        | Annexin                                                       | <i>Heterodera avenae</i>       | 8.83E-152 | 67%          | 1           |
| AAN32888        | Annexin 4C10                                                  | <i>Heterodera glycines</i>     | 6.60E-14  | 56%          | 1           |
| AAC47533        | Calponin homolog MjCAP-1                                      | <i>Meloidogyne javanica</i>    | 3.43E-43  | 66%          | 1           |
| AFK76483        | Calreticulin                                                  | <i>Radopholus similis</i>      | 1.00E-157 | 87%          | 1           |
| ABC88426        | Cathepsin D-like aspartic proteinase preproprotein            | <i>Meloidogyne incognita</i>   | 1.78E-37  | 82%          | 4           |
| ACJ13100        | Cathepsin L                                                   | <i>Heterodera avenae</i>       | 0         | 91%          | 1           |
| AAS84611        | Cathepsin L-like cysteine proteinase I variant form precursor | <i>Heterodera glycines</i>     | 1.46E-90  | 80%          | 1           |
| AGL80530        | Cathepsin-S                                                   | <i>Heterodera avenae</i>       | 7.58E-128 | 96%          | 1           |
| D1FNJ9          | CLAVATA3/ESR (CLE)-related protein 4A-1 precursor             | <i>Globodera rostochiensis</i> | 7.00E-04  | 37%          | 1           |
| D1FNK3          | CLAVATA3/ESR (CLE)-related protein 4B-2 precursor             | <i>Globodera rostochiensis</i> | 0.006     | 42%          | 1           |
| ADD62691        | Cellulose binding protein                                     | <i>Heterodera avenae</i>       | 1.33E-13  | 33%          | 1           |
| AAN32887        | Cellulose binding protein                                     | <i>Heterodera glycines</i>     | 9.40E-18  | 32%          | 1           |
| AAK83075        | Collagen                                                      | <i>Meloidogyne javanica</i>    | 5.36E-13  | 79%          | 1           |
| AAB61596        | Galectin                                                      | <i>Globodera rostochiensis</i> | 1.20E-92  | 83%          | 1           |
| AMQ99047        | Fatty acid and retinol binding protein 1                      | <i>Heterodera avenae</i>       | 1.21E-125 | 100%         | 1           |
| AMQ99048        | Fatty acid and retinol binding protein 2                      | <i>Heterodera avenae</i>       | 2.53E-147 | 100%         | 1           |
| AAC46496        | SEC-1                                                         | <i>Meloidogyne incognita</i>   | 1.68E-42  | 32%          | 1           |
| CAA70477        | SEC-2 proteins                                                | <i>Globodera pallida</i>       | 5.65E-49  | 53%          | 1           |
| ABN64198        | Glutathione S-transferase-1                                   | <i>Meloidogyne incognita</i>   | 1.53E-81  | 56%          | 5           |
| CAB48391        | Peroxiredoxin                                                 | <i>Globodera rostochiensis</i> | 1.16E-79  | 86%          | 3           |
| ACZ67203        | Peroxiredoxin                                                 | <i>Meloidogyne incognita</i>   | 2.80E-31  | 47%          | 1           |
| CAD38524        | Putative glutathione peroxidase                               | <i>Globodera rostochiensis</i> | 1.50E-99  | 85%          | 7           |
| CAD38523        | Secreted glutathione peroxidase                               | <i>Globodera rostochiensis</i> | 7.55E-165 | 88%          | 5           |
| AAR35032        | SXP/RAL-2 protein                                             | <i>Meloidogyne incognita</i>   | 5.05E-30  | 47%          | 1           |
| CAM84511        | Transthyretin-like protein 2 precursor                        | <i>Radopholus similis</i>      | 1.99E-33  | 84%          | 2           |
| CAM84512        | Transthyretin-like protein 3 precursor                        | <i>Radopholus similis</i>      | 1.01E-24  | 81%          | 1           |
| <b>CAM84513</b> | Transthyretin-like protein 4 precursor                        | <i>Radopholus similis</i>      | 1.99E-76  | 73%          | 1           |
| <b>AAW56830</b> | Troponin C-like protein                                       | <i>Meloidogyne incognita</i>   | 2.32E-112 | 97%          | 2           |
| <b>AAN32889</b> | Ubiquitin extension protein                                   | <i>Heterodera glycines</i>     | 7.35E-57  | 85%          | 2           |
| <b>AAP30081</b> | Ubiquitin extension protein                                   | <i>Heterodera schachtii</i>    | 5.36E-30  | 55%          | 2           |
| <b>AAK60209</b> | Venom allergen-like protein 1                                 | <i>Heterodera glycines</i>     | 3.98E-87  | 75%          | 2           |
| <b>AAK55116</b> | Venom allergen-like protein 2                                 | <i>Heterodera glycines</i>     | 1.87E-105 | 66%          | 1           |
| <b>AAL40718</b> | Myosin regulatory light chain                                 | <i>Meloidogyne incognita</i>   | 1.35E-20  | 80%          | 2           |
| <b>CAB75701</b> | Putative hypodermis secreted protein                          | <i>Globodera rostochiensis</i> | 1.80E-97  | 66%          | 1           |
| <b>ADI82806</b> | Dorsal esophageal gland-specific protein                      | <i>Heterodera avenae</i>       | 0         | 100%         | 1           |
| <b>AAN08587</b> | Putative esophageal gland cell secretory protein 21           | <i>Meloidogyne incognita</i>   | 3.49E-117 | 48%          | 2           |
| <b>AAN15808</b> | Putative esophageal gland cell secretory protein 28           | <i>Meloidogyne incognita</i>   | 3.62E-60  | 61%          | 3           |
| <b>AAN15809</b> | Putative esophageal gland cell secretory protein 29           | <i>Meloidogyne incognita</i>   | 1.29E-24  | 46%          | 1           |
| <b>AAQ10017</b> | Putative esophageal gland cell secretory protein 3            | <i>Meloidogyne incognita</i>   | 5.52E-32  | 49%          | 2           |

|                 |                                                            |                            |           |     |    |
|-----------------|------------------------------------------------------------|----------------------------|-----------|-----|----|
| <b>AAM95699</b> | Putative esophageal gland cell secretory protein<br>33A09  | <i>Heterodera glycines</i> | 9.76E-24  | 35% | 4  |
| <b>AAP30755</b> | Putative esophageal gland cell secretory protein<br>29D09  | <i>Heterodera glycines</i> | 2.88E-29  | 37% | 1  |
| <b>AAP30760</b> | Putative esophageal gland cell secretory protein<br>G10A07 | <i>Heterodera glycines</i> | 1.78E-08  | 74% | 1  |
| <b>AAP30754</b> | Putative esophageal gland cell secretory protein<br>G11A06 | <i>Heterodera glycines</i> | 2.06E-42  | 61% | 1  |
| <b>AAO85452</b> | Putative esophageal gland cell secretory protein<br>G12H04 | <i>Heterodera glycines</i> | 4.37E-67  | 67% | 3  |
| <b>AAO85455</b> | Putative esophageal gland cell secretory protein<br>G17G06 | <i>Heterodera glycines</i> | 6.19E-15  | 53% | 1  |
| <b>AAO85457</b> | Putative esophageal gland cell secretory protein<br>G19B10 | <i>Heterodera glycines</i> | 1.85E-24  | 33% | 3  |
| <b>AAO85459</b> | Putative esophageal gland cell secretory protein<br>G20E03 | <i>Heterodera glycines</i> | 1.16E-93  | 73% | 5  |
| <b>AAM50038</b> | Putative esophageal gland cell secretory protein<br>G27D09 | <i>Heterodera glycines</i> | 6.83E-11  | 43% | 1  |
| <b>AAP30774</b> | Putative esophageal gland cell secretory protein<br>G30E03 | <i>Heterodera glycines</i> | 8.01E-74  | 64% | 10 |
| <b>AAP30775</b> | Putative esophageal gland cell secretory protein<br>G32E03 | <i>Heterodera glycines</i> | 8.04E-13  | 90% | 7  |
| <b>AAP30762</b> | Putative esophageal gland cell secretory protein<br>G7E05  | <i>Heterodera glycines</i> | 8.07E-65  | 84% | 3  |
| <b>AAN32892</b> | Putative esophageal gland cell secretory protein<br>4D06   | <i>Heterodera glycines</i> | 3.38E-61  | 60% | 20 |
| <b>AAN32891</b> | Putative esophageal gland cell secretory protein<br>5D06   | <i>Heterodera glycines</i> | 2.96E-20  | 45% | 1  |
| <b>AAN32886</b> | Putative esophageal gland cell secretory protein<br>G2D01  | <i>Heterodera glycines</i> | 3.21E-49  | 67% | 1  |
| <b>AAO33473</b> | Putative esophageal gland cell secretory protein<br>4E02   | <i>Heterodera glycines</i> | 2.05E-31  | 79% | 3  |
| <b>AAO33477</b> | Putative esophageal gland cell secretory protein<br>4G05   | <i>Heterodera glycines</i> | 4.56E-19  | 58% | 2  |
| <b>AAO33475</b> | Putative esophageal gland cell secretory protein<br>5D08   | <i>Heterodera glycines</i> | 5.79E-37  | 60% | 1  |
| <b>AAF76926</b> | Putative esophageal gland cell secretory protein<br>SYV55  | <i>Heterodera glycines</i> | 6.34E-102 | 92% | 2  |

\* # CCN ESTs, number of ESTs in Cereal cyst nematode *H. avenae*.

**Table S4B.** The CAZy enzymes identified in the transcriptome of *H. avenae* with homology to that of other phytonematodes.

| CCN enzyme        | CAZy family  | Best identity descriptor in NR                                        | Accession | E value   | Expression bias |
|-------------------|--------------|-----------------------------------------------------------------------|-----------|-----------|-----------------|
| ISOTIG18265       | CBM2         | Expansin [ <i>Heterodera glycines</i> ]                               | ADL29728  | 1.37E-96  | -               |
| ISOTIG19070       | CBM2         | Expansin [ <i>Heterodera glycines</i> ]                               | ADL29728  | 3.53E-18  | Pre             |
| ISOTIG16975       | CBM2         | Expansin B1 [ <i>Heterodera avenae</i> ]                              | AEP19215  | 0         | Pre             |
| ISOTIG18443       | CBM2         | Expansin B3, partial [ <i>Globodera pallida</i> ]                     | AEU04794  | 5.25E-88  | -               |
| ISOTIG16488       | GH5          | Beta-1,4-endoglucanase-2 precursor [ <i>Heterodera glycines</i> ]     | AAC48326  | 3.91E-93  | Pre             |
| HO9SJLY04JO3RG_3  | GH5          | Cellulase [ <i>Heterodera glycines</i> ]                              | AAM50039  | 1.24E-63  | Pre*            |
| ISOTIG15773       | GH5          | Cellulase ENG-5 [ <i>Heterodera glycines</i> ]                        | AAN32884  | 1.21E-164 | Pre             |
| ISOTIG15246       | GH5          | Cellulase, partial [ <i>Aphelenchoides fragariae</i> ]                | AFI63769  | 5.12E-57  | -               |
| ISOTIG17481       | GH5          | GHF5 endo-1,4-beta-glucanase precursor [ <i>Radopholus similis</i> ]  | ABV54446  | 1.52E-80  | Pre             |
| ISOTIG17176       | GH5          | Beta-1,4-endoglucanase 3 [ <i>Heterodera avenae</i> ]                 | AFQ55682  | 0         | Pre             |
| ISOTIG16403       | GH5          | Beta-1,4-endoglucanase 2 [ <i>Heterodera avenae</i> ]                 | AFQ55680  | 0         | Pre             |
| ISOTIG14720       | GH5/<br>CBM2 | Beta-1,4-endoglucanase 1 [ <i>Heterodera avenae</i> ]                 | ACO55952  | 0         | Pre             |
| ISOTIG15098       | GH5/<br>CBM2 | Beta-1,4-endoglucanase precursor [ <i>Globodera rostochiensis</i> ]   | AAC63988  | 1.07E-166 | Pre             |
| ISOTIG08169       | GT20         | Putative trehalose 6-phosphate synthase [ <i>Aphelenchus avenae</i> ] | CAH18869  | 0         | -               |
| ISOTIG18756       | PL3          | Pectate lyase 1 [ <i>Heterodera avenae</i> ]                          | ADD82848  | 3.68E-33  | Pre             |
| HOWVQCB02G9WZE_10 | PL3          | Pectate lyase 2, partial [ <i>Heterodera avenae</i> ]                 | ADD73447  | 1.31E-49  | Pre*            |
| HOWVQCB02JPONP_5  | PL3          | Pectate lyase [ <i>Heterodera glycines</i> ]                          | ADW77533  | 2.20E-72  | Pre*            |
| HOWVQCB02GVIDZ_7  | PL3          | pectate lyase [ <i>Heterodera glycines</i> ]                          | ADW77534  | 9.46E-115 | Pre*            |

‘Pre’ means significantly high expression in pre-parasitic stage; ‘Pre\*’ means coding by singleton in pre-parasitic library. The singleton might be the gene with low expression and was sequenced only once. CBM, carbohydrate binding module; GH, glycoside hydrolase; GT, glycosyl transferase; PL, polysaccharide lysate. NR means non-redundant GenBank proteins database.
